# Supplementary material
Source: publisher figshare collection journal article supplement (https://gsapubs.figshare.com/ndownloader/files/22411269)
Supplement: Supplementary file 1 [file 22411269]

Archive with 2 entries (2 files):
- Scudder et al GEOSPHERE Supp Tables.xlsx
- Scudder et al GEOSPHERE SM FINAL.pdf
