# Supplementary material
Source: publisher figshare collection journal article supplement (https://gsapubs.figshare.com/ndownloader/files/22411269)
Supplement: Supplementary file 1 [file 22411269 › Scudder et al GEOSPHERE Supp Tables.xlsx]

## Sheet: Table S1A, C0011 sample data
Table S1A: Chemical concentration data for Site C0011. "mbsf" is "meters below seafloor". "Wt. %" is "weight percent". "ppm" is "parts per million". Empty cells are for concentrations less than the detection limit. Data are overspecified for calculation purposes.
Leg	Site	Hole	Core	Type	Section	Top (cm)	Bottom (cm)	Depth		SiO2	Al2O3	TiO2	Fe2O3	MnO	CaO	MgO	Na2O	K2O	P2O5		Li	Be	Sc	V	Cr	Co	Ni	Cu	Zn	Rb	Sr	Y	Zr	Nb	Mo	Cd	Sn	Sb	Cs	Ba	La	Ce	Pr	Nd	Sm	Eu	Tb	Gd	Dy
								(mbsf)		wt%	wt%	wt%	wt%	wt%	wt%	wt%	wt%	wt%	wt%		ppm	ppm	ppm	ppm	ppm	ppm	ppm	ppm	ppm	ppm	ppm	ppm	ppm	ppm	ppm	ppm	ppm	ppm	ppm	ppm	ppm	ppm	ppm	ppm	ppm	ppm	ppm	ppm	ppm
333	C0011	C	1	H	1	46	48	0.441		61.8523	15.6116	0.624662	5.15535	0.0613194	6.80705	2.55768	4.26669	2.9734	0.0899221		54.0175	1.9273	13.1071	105.931	53.4426	10.862	38.8796	61.99	84.06	106.874	270.562	20.324	99.8419	10.4261	0.471459	0.0295391	2.22461	0.480023	7.47072	850.066	23.3333	48.9264	5.54945	20.1368	4.07277	0.914035	0.581215	3.68602	3.40978
333	C0011	C	2	H	2	0	19	4.634		60.43	16.3037	0.690692	5.51997	0.0668412	8.61137	2.48426	2.86303	2.99671	0.0334206		59.66	2.04	14.2	10.56	63.48	12.84	32.685	55.07	82.31	102.32	333.607	21.04	105.395	10.22	0.69	0.03	2.16	0.77	7.44	507.642	23.32	49.73	5.71	22.07	4.37	0.98	0.62	3.96	3.43
333	C0011	C	2	H	5	0	19.5	7.361		61.8572	16.2946	0.688659	5.56481	0.0666445	6.8255	2.47695	3.06564	3.11007	0.0499833		62.03	1.97	13.755	52.915	57.93	12.22	33.695	62.215	178.11	100.51	273.293	20.91	109.39	9.99	0.73	0.06	2.1	0.92	7.51	533.815	24	53.8	5.84	23.81	4.51	0.99	0.63	4.18	3.64
333	C0011	C	2	H	8	0	19	10.075		59.9544	15.8703	0.656394	5.94649	0.066752	8.75007	2.6367	3.18184	2.89258	0.0445013		57.61	1.98	13.86	55.225	79.87	13.47	33.15	53.9	90.66	97.67	323.413	20.7	114.78	9.82	0.77	0.06	1.96	0.81	8.08	492.575	23.9	48.88	5.66	20.695	4.27	0.99	0.61	3.95	3.49
333	C0011	C	3	H	8	0	21	19.47		58.2702	15.3745	0.643235	5.83506	0.0804043	11.0843	2.46956	3.1932	2.92901	0.120606		59.96	1.76	12.91	107.61	71.24	12.16	37.56	56.99	93.19	98.78	360.683	21.64	104.64	9.04	0.99	0.1	1.9	0.9	7.2	487.595	21.96	44.08	5.23	19.235	4.07	0.92	0.6	3.85	3.56
333	C0011	D	1	H	4	0	20	24.979		59.4623	16.006	0.689417	5.96346	0.0689417	9.39906	2.56233	2.93002	2.86108	0.0574515		61.87	2.02	13.885	67.075	54.5	13.02	33.87	64.98	89.59	105.81	336.857	23.01	97.79	9.51	0.59	0.07	2.09	1.15	7.34	584.165	24.01	54.42	5.83	24.095	4.64	1.03	0.65	4.35	3.83
333	C0011	D	2	H	5	0	20	35.794		63.0083	16.065	0.66752	5.9298	0.066752	5.52372	2.53101	3.25972	2.95934			59.69	1.95	14.16	14.545	59.42	13.13	38.92	62.18	94.06	97.76	236.97	20.37	102.885	9.22	0.97	0.04	2.02	0.94	6.96	575.405	21.81	45.89	5.42	21.03	4.17	0.95	0.6	3.82	3.33
333	C0011	D	3	H	2	81.5	83.5	42.117		65.5492	17.031	0.711793	6.00554	0.061952	1.48236	2.63096	3.20324	3.2277	0.0962513		65.3209	2.05799	15.2894	121.53	59.5275	11.4952	33.1156	57.496	93.8176	109.818	137.921	19.8719	121.122	11.3457	0.501037	0.0422241	2.50654	0.870499	7.5823	528.93	23.2741	51.0742	5.86765	21.649	4.39866	0.966626	0.614864	3.92348	3.58309
333	C0011	D	4	H	5	0	20.5	51.939		63.1493	15.9366	0.662216	5.63969	0.075992	5.95994	2.26348	3.53905	2.72485	0.048852		55.64	1.68	15.03	39.555	49.03	11.3	31.94	70.605	84.26	84	246.75	21.47	102.885	8.1	0.67	0.04	1.77	0.74	6.04	471.3	19.62	44.29	4.88	20.305	4.04	0.95	0.6	3.92	3.62
333	C0011	D	5	H	5	0	20	60.694		62.292	16.7196	0.722417	6.35946	0.07662	5.52758	2.46278	3.15236	2.63792	0.0492557		60.46	1.79	17.66	67.27	53.08	13.98	34.41	76.355	94.66	98.59	238.297	23.75	103.535	9.28	0.68	0.03	1.96	0.86	6.63	554.197	22.87	52.86	5.6	22.995	4.44	1.03	0.65	4.3	3.9
333	C0011	D	7	H	4	0	20	76.472		65.5468	16.3934	0.670855	6.27196	0.0745395	2.41721	2.27345	3.43946	2.80055	0.111809		52.8	1.72	17.335	111.245	43.45	11.75	34.585	52.405	89.28	88.16	156.427	27.82	120.315	8.25	1.24	0.03	1.82	0.6	6.04	541.242	20.26	47.14	5.16	21.66	4.43	1.07	0.7	4.49	4.29
333	C0011	D	9	H	3	0	20	84.287		63.8125	17.1197	0.720889	6.25688	0.0660357	3.04865	2.51486	3.41184	3.03764	0.0110059		68.52	2.14	16.545	42.1	73.9	11.39	33.9	64.245	94.32	111.25	175.26	21.73	103.88	10.48	0.67	0.05	2.27	0.79	7.92	557.237	23.64	50.22	5.77	22.21	4.39	1	0.62	3.98	3.52
333	C0011	D	10	H	5	0	21	95.606		64.3443	16.76	0.717352	7.00505	0.0652138	2.1901	2.53791	3.39112	2.95636	0.0326069		65.12	2.05	15.64	52.005	70.33	15.23	51.27	59.82	90.16	103.8	149.94	21.21	106.47	9.7	1.17	0.06	2.14	0.99	8.34	560.727	22.33	47.85	5.46	21.32	4.21	0.96	0.6	3.9	3.45
333	C0011	D	11	H	5	0	22	104.152		65.3888	17.5503	0.747993	6.25344	0.0549995	1.19349	2.63997	3.05797	3.07997	0.0329997		73.15	2.31	15.42	53.195	86.76	12.72	39.31	80.04	103.68	118.43	130.507	23.65	114.305	11.73	0.59	0.06	2.5	1.25	8.99	605.092	25.94	56.5	6.28	23.855	4.64	1.02	0.66	4.2	3.71
333	C0011	D	12	H	5	0	20.5	114.25		64.2393	17.2359	0.705079	5.85546	0.077118	3.32158	2.27498	3.40421	2.88642			63.83	1.9	16.025	25.37	57.13	11.68	41.445	69.725	101.23	92.94	180.623	23.82	103.2	9.65	0.84	0.08	2.06	1.02	7.24	550.908	22.35	51.08	5.46	22.505	4.39	1	0.65	4.22	3.91
333	C0011	D	13	H	1	56	58	119.333		61.9821	16.9332	0.706663	5.91936	0.106852	5.22248	2.49188	3.46953	3.07754	0.0904598		70.8181	2.12367	14.3825	112.812	67.0932	11.7447	39.5902	44.3633	88.9713	127.939	238.209	22.7905	111.049	10.9637	0.535684	0.0772063	2.44929	0.823961	8.70513	587.839	26.5932	56.2862	5.97243	22.984	4.51201	1.00767	0.658567	4.18664	3.77773
333	C0011	D	14	H	5	0	22	129.72		64.2368	17.5908	0.739291	6.40357	0.0652316	1.98956	2.64731	3.19635	3.08763	0.0434877		71.73	2.26	15.91	60.27	67.8	12.02	42.71	64.02	105.16	116.26	142.03	23.77	113.545	10.98	1.03	0.07	2.52	1.15	9.02	562.1	25.57	55.31	6.14	24.935	4.71	1.05	0.66	4.35	3.86
333	C0011	D	15	H	4	0	21.5	137.518		65.1133	17.1765	0.726232	6.60211	0.0550176	1.15537	2.61884	3.20202	3.23504	0.115537		70.9	2.3	15.055	121.025	83.74	11.27	37.92	52.765	94.88	117.47	129	23.72	118.49	11.51	0.65	0.04	2.47	0.86	9.21	597.305	26.15	55.88	6.32	24.345	4.73	1.06	0.66	4.3	3.76
333	C0011	D	16	H	3	33	35	144.817		64.7638	16.7894	0.701323	7.08927	0.0931366	1.35192	2.60156	3.33549	3.15969	0.114478		71.7207	2.3428	14.6161	112.467	66.4213	13.8558	40.7122	15.8551	92.2329	137.002	129.329	19.4059	112.535	11.307	0.657396	0.048119	2.51881	0.826952	8.66858	574.044	25.2272	54.5087	5.7607	22.035	4.1867	0.930481	0.584904	3.75597	3.35802
333	C0011	D	17	H	6	0	20.5	154.832		64.4233	17.3136	0.714884	6.00949	0.111701	2.50209	2.46858	3.11645	3.22815	0.111701		70.98	2.31	14.39	112.375	79.6	11.88	42.52	72.585	104.12	119.69	162.093	22.82	113.18	11.57	0.55	0.06	2.53	1.04	9.29	591.96	22.84	55.77	5.71	22.02	4.4	0.98	0.64	4.05	3.67
333	C0011	D	18	H	4	0	21.5	161.38		64.8906	17.4486	0.729291	6.16088	0.0653097	1.21911	2.52531	3.52672	3.34168	0.092522		73.47	2.31	15.935	126.49	67.87	13.64	46.05	71.89	140.51	122.07	128.553	24.46	116.055	11.99	0.77	0.12	2.61	1.37	9.09	616.62	27.46	61.38	6.57	26.34	4.9	1.08	0.67	4.46	3.92
333	C0011	D	19	H	3	0	20	170.237		64.571	17.2824	0.686866	6.81881	0.121863	1.41251	2.58129	3.12413	3.31247	0.0886279		78.6	2.4	14.325	116.94	88.18	12.82	36.955	55.35	104.46	108.77	130.063	21.87	108.985	10.9	0.64	0.04	2.44	0.89	10.23	542.602	26.53	51.03	6.3	22.92	4.75	1.03	0.67	4.34	3.81
333	C0011	D	21	H	4	0	20.5	182.687		63.9277	18.1214	0.769484	6.49665	0.120919	1.45103	2.69869	2.71518	3.57261	0.126415		70.74	2.64	14.725	130.04	79.45	14.69	47.805	59.595	104.49	123.66	132.433	22.31	113.425	12.23	0.46	0.08	2.69	1.27	10.62	591.972	28.03	57.76	6.65	26.92	4.9	1.06	0.64	4.3	3.64
333	C0011	D	23	T	3	21	23	189.025		63.5404	17.3949	0.70976	5.99864	0.0973037	2.86329	2.56197	3.4438	3.31965	0.0702426		88.6629	2.22969	13.4585	121.228	67.1648	11.194	39.0375	68.0419	98.6318	128.194	173.559	22.5425	121.677	11.8959	0.621925	0.0532505	2.55824	1.02122	8.55314	773.092	29.0588	70.7913	6.67052	26.3451	4.8372	1.02416	0.671289	4.21832	3.7994
333	C0011	D	25	T	2	0	29	200.855		63.6756	17.8579	0.741314	6.41735	0.0774508	2.4397	2.58354	2.58907	3.51848	0.0995796		74.46	2.44	14.88	120.96	71.14	14.02	51.095	61.58	106.69	124.65	159.37	22.22	110.14	11.68	0.64	0.06	2.53	1.26	9.88	573.555	27.73	59.77	6.57	26.635	4.93	1.06	0.65	4.37	3.71
333	C0011	D	27	X	3	0	30.5	212.136		63.719	18.4007	0.766459	6.81233	0.137276	1.13253	2.74552	2.47097	3.70646	0.108677		71.23	3.03	14.64	129.435	101.94	13.58	41.45	53.505	109.11	128.69	123.293	22.7	117.605	14.2	0.65	0.04	3.01	1.11	12.76	527.72	28.25	65.72	6.9	26.235	4.96	1.07	0.66	4.33	3.66
333	C0011	D	29	X	4	0	31	223.326		63.0728	17.4065	0.741643	7.34448	0.0996236	2.56808	2.56808	2.99978	3.0994	0.0996236		75.22	2.38	16.395	130.875	64.01	16.75	54.695	67.825	117.22	114.44	163.61	22.69	107.055	11.24	0.82	0.07	2.43	1.24	8.91	532.858	26.98	59.22	6.45	26.265	4.92	1.08	0.67	4.49	3.81
333	C0011	D	31	X	4	0	29	238.14		59.2794	16.374	0.674864	6.01659	0.343151	9.26508	2.37346	2.73377	2.93966			66.01	1.95	13.535	4.84	51.86	12.68	38.52	61.065	77.57	97.68	317.053	22.43	110.675	10.06	0.34	0.03	1.93	0.71	6.89	605.492	23.64	52.05	5.5	22.485	4.17	0.93	0.6	3.9	3.53
333	C0011	D	33	X	3	0	30.5	248.87		64.0188	17.9441	0.700257	5.89748	0.109415	2.79556	2.48372	2.91044	3.14022			79.93	2.32	13.96	8.6	81.65	11.92	43.79	75.12	93.26	101.48	157.387	21.57	115.22	11.26	0.42	0.03	2.36	0.78	8.32	561.22	27.05	54.77	6.35	22.715	4.63	1	0.64	4.16	3.74
333	C0011	D	34	X	4	0	34	254.441		64.8646	17.3642	0.716496	6.62216	0.130272	1.5307	2.48059	2.64886	3.56077	0.08142		67.69	2.5	13.89	117.525	88.84	21.44	72.555	68.88	103.5	107.01	134.94	22.41	115.68	11.49	1.14	0.02	2.43	0.83	10.96	601.562	28.58	53.81	6.6	24.025	4.86	1.06	0.67	4.42	3.86
333	C0011	D	36	X	1	46	48	266.433		64.0249	17.8406	0.735043	6.22921	0.12387	2.47399	2.5558	2.66165	3.27932	0.0756189		72.9881	2.3405	15.1144	123.501	64.0446	11.6636	36.8753	63.4516	104.801	120.229	163.89	21.5945	117.063	12.2492	0.406905	0.0305616	2.67562	0.808653	8.28238	523.208	27.1562	55.0665	6.51985	23.5733	4.66899	1.04601	0.656153	4.1629	3.77368
333	C0011	D	37	X	4	0	32.5	279.348		63.0826	18.1051	0.745696	6.10813	0.208356	2.83474	2.63735	2.48931	3.68461	0.104178		71.18	2.63	14.685	136.015	83.69	14.8	50.03	83.24	110.73	136.2	175.943	24.71	122.205	13.04	0.55	0.03	2.71	1.24	10.83	553.277	29.45	60.6	7.11	27.32	5.24	1.16	0.72	4.68	4.06
333	C0011	D	38	X	3	0	35	285.32		64.4753	17.6509	0.728657	6.69386	0.152257	1.39206	2.59924	2.52311	3.69766	0.0870038		64.47	2.57	15.03	117.275	69.11	18.59	58.84	68.25	106.28	128.35	133.37	24.75	123.4	12.74	0.92	0.03	2.52	1.15	9.57	522.943	29.12	63.53	6.9	27.715	5.04	1.09	0.67	4.54	3.89
333	C0011	D	39	X	5	0	35	297.042		60.691	17.4831	0.730337	6.34831	0.719101	5.61236	2.51685	2.35955	3.38202	0.157303		68.2	2.18	15.285	118.21	63.09	15.51	48.705	65.975	112.61	107.12	224.17	25.73	107.825	10.04	0.81	0.03	2.18	0.81	8.07	546.46	24.28	54.54	5.74	23.475	4.43	1	0.65	4.24	3.87
333	C0011	D	40	X	5	0	40	306.259		60.6268	16.8241	0.678848	5.94558	0.384681	7.42207	2.28546	2.34203	3.39424	0.0961702		64.78	2.29	13.415	102.69	74.29	13.36	45.865	57.545	87.05	117.72	269.487	23.92	109.575	11.25	0.9	0.03	2.36	0.86	8.95	552.332	26.14	55.33	6.14	23.12	4.39	0.98	0.63	4.03	3.62
333	C0011	D	41	X	5	0	38.5	316.37		63.0992	17.7322	0.688971	6.11899	0.151807	4.13966	2.39388	2.44059	3.15292	0.0817423		77.22	2.22	14.605	108.405	78.67	11.02	42.665	43.015	91.81	97.74	189.733	19.05	111.075	10.37	0.5	0.03	2.26	0.6	9.4	489.19	24.08	47.6	5.63	20.27	4.09	0.9	0.57	3.7	3.32
333	C0011	D	42	X	4	0	39	324.012		65.5314	17.2729	0.713267	6.06277	0.142653	1.81883	2.43105	2.43699	3.50689	0.0832145		59.24	2.34	13.805	116.755	84.71	13.98	50.095	58.61	96.78	118.26	138.987	20.42	105.32	11.22	0.47	0.02	2.3	0.84	9.4	554.637	26.94	53.87	6.24	22.16	4.4	0.94	0.6	3.91	3.48
333	C0011	D	43	X	3	0	35.5	331.795		64.8749	17.4797	0.707143	6.03282	0.143638	2.04961	2.5192	2.5413	3.54677	0.104967		60.48	2.56	14.695	137.165	80.72	18.75	54.7	134.09	118.14	129.41	154.423	22.76	112.63	12	0.69	0.07	2.57	1.53	9.78	589.743	27.18	57.68	6.46	24.385	4.66	1.02	0.64	4.1	3.64
333	C0011	D	45	X	3	0	38.5	342.083		66.718	17.0317	0.726392	6.23487	0.0880475	0.748404	2.44332	2.38829	3.54391	0.0770416		62.7	2.47	15.36	126.285	88.76	12.14	37.375	75.57	107.33	103.69	104.66	19.05	112.52	11.59	0.61	0.03	2.47	0.83	11.67	406.688	25.8	48.84	6.07	21.725	4.35	0.93	0.59	3.85	3.41
333	C0011	D	48	X	3	0	38	356.491		66.8361	16.5601	0.666995	5.88267	0.174949	1.15904	2.45476	2.64611	3.53179	0.0874747		54.19	2.37	14.755	121.045	71.21	7.84	30.27	61.165	93.27	121.44	130.233	28.89	109.98	11.05	0.38	0.03	2.32	0.72	9.84	651.525	25.67	55.88	6.27	24.235	4.77	1.02	0.71	4.52	4.23
333	C0011	D	52	X	1	134	136	376.34		65.5033	16.628	0.70452	6.61835	0.754283	1.19555	2.5457	2.59689	3.37132	0.0821211		103.554	2.34542	16.0806	120.63	63.1602	9.73211	20.6117	56.7207	92.4492	126.135	116.44	24.3347	125.738	11.6049	0.788951	0.027664	3.44455	0.518759	8.70503	620.631	26.8692	63.5543	6.2338	24.3116	4.53476	0.95977	0.659917	4.11449	3.86499
322	C0011	B	6	R	5	27	50	388.589		63.8789	16.8724	0.704994	5.86968	0.318822	4.15865	2.4861	2.23652	3.38534	0.0886185		61.2372		17.1214	140.103	72.438	17.7659	58.1771	104.5	121.758	127.831	185.674	24.1672	96.1875	11.7873			1.73565		8.92101	380.651	29.3099	61.3246	6.76708	27.092	5.34016	1.00955	0.666126	4.22947	3.92761
322	C0011	B	10	R	3	2	32	424.765		57.0457	16.1863	0.650726	6.05259	0.475161	10.9799	2.46807	2.17975	3.27358	0.68821		59.0253		16.9925	132.871	58.3524	9.97997	16.6591	70.6501	85.7784	109.68	329.981	53.5442	85.2515	9.20167			1.43898		7.76812	362.292	35.553	73.673	7.88347	32.9867	6.6031	1.3681	1.04625	6.39621	6.41288
322	C0011	B	13	R	3	0	25	453.32		65.2663	18.2198	0.708898	6.39743	0.0861246	1.19289	2.54898	2.44258	3.06486	0.0721027		73.9501	1.04054	16.357	128.296	63.9493	19.6355	65.6806	66.7451	101.727	114.979	113.531	20.1324	104.193	10.5364	2.31936		2.57087	1.37357	7.78466	374.227	23.7478	53.7634	5.83115	23.0997	4.60444	0.939227	0.615456	3.9637	3.5999
322	C0011	B	15	R	3	2	42	471.992		65.7702	18.4114	0.74419	6.70929	0.0530458	0.353981	2.43721	2.28081	3.17774	0.0621649		73.8447	1.07448	15.2533	127.058	73.035	10.7926	35.6476	71.181	107.76	142.729	92.6357	24.1909	113.556	13.4374	1.24179		3.24832	0.820323	10.3051	405.225	31.5259	70.567	7.4742	29.2327	5.57138	1.09224	0.729748	4.75393	4.18504
322	C0011	B	19	R	3	2	37	492.617		65.3756	17.9919	0.754747	6.51468	0.274676	0.971183	2.36448	2.37976	3.28747	0.0855835		73.7294	1.10403	14.7377	120.958	72.0647	10.6185	39.4459	65.1999	107.901	136.884	111.792	24.5832	104.825	12.6708	0.89		2.89568	0.704661	9.56926	428.01	30.1842	63.619	6.98826	27.3061	5.09914	1.05458	0.67979	4.42248	3.96648
322	C0011	B	21	R	2	2	36	501.67		65.933	16.8676	0.706065	7.41657	0.0642212	0.430914	2.4578	2.28007	3.77854	0.0652697		67.4157		17.7485	151.14	92.0642	28.0163	102.794	52.1835	101.8	148.013	108.238	19.172	107.581	12.3398			4.47353	2.03819	10.1421	446.086	28.6119	59.0869	6.20724	25.4059	4.42844	0.854799	0.541533	3.4216	3.21166
322	C0011	B	23	R	2	2	42	521.165		65.8711	17.6686	0.75365	6.68157	0.100637	1.10066	2.38835	2.33871	3.00662	0.0901509		65.4578	1.07569	16.0404	130.306	66.2474	16.2463	72.5651	95.0896	122.295	131.965	111.096	21.7319	100.467	11.8736	1.95065		2.92974	3.09134	10.9503	448.787	27.1363	58.0651	6.40747	24.8247	4.65545	0.969847	0.618225	4.01325	3.58848
322	C0011	B	25	R	2	0	50	539.86		66.2465	17.6452	0.74843	5.98228	0.0926459	1.64785	2.10196	2.73237	2.7147	0.0880732		70.7958	1.04787	16.7544	123.625	53.0572	11.24	30.3058	50.0835	90.7976	98.5155	140.778	21.2727	105.762	10.4117	1.89015		2.38131	0.697711	5.6553	470.096	23.718	52.2388	5.86627	23.3629	4.64902	1.00947	0.648665	4.06903	3.74211
322	C0011	B	26	R	2	0	52	550.22		66.4806	16.7222	0.716858	6.11433	0.132008	1.87876	2.43651	2.09859	3.34745	0.0727296		70.3631		17.4207	162.291	73.0925	16.0655	34.3215	114.841	108.029	134.383	165.792	21.7852	106.055	14.8848			31.504		9.38454	504.078	29.8888	62.2567	6.73993	26.6167	5.26482	0.969604	0.603389	3.95831	3.69202
322	C0011	B	27	R	2	2	48	559.38		63.9131	17.7286	0.755118	6.58035	0.100156	2.89577	2.46361	2.8123	2.65142	0.0995514		62.1508	1.17505	17.4279	138.928	59.2663	11.9939	36.0046	60.3368	89.5942	105.837	187.503	23.2653	106.441	9.90077	1.12962		2.54879	0.544874	6.3892	852.242	24.6177	53.2395	5.96002	23.8308	4.74942	1.11255	0.669882	4.23598	3.99465
322	C0011	B	30	R	2	2	52	581.8		64.7635	18.2489	0.753972	6.82333	0.230383	0.848823	2.66117	2.18227	3.40347	0.0842571		84.0943		19.596	153.634	72.9154	18.8243	65.1788	60.2359	109.17	133.026	132.086	23.6253	114.574	12.2452					9.31668	513.153	29.7947	61.4218	6.85921	27.8886	5.50857	1.03392	0.677292	4.30137	4.03615
322	C0011	B	31	R	2	0	50	587.83		66.3386	17.3933	0.719902	6.65308	0.103491	0.872834	2.4698	2.09073	3.27919	0.0790684		66.1117	1.19661	15.4374	128.621	73.3174	14.6138	43.9976	68.257	107.06	141.771	107.896	21.9341	108.819	12.8487	1.44955		2.95733	1.02302	9.59798	540.166	31.0945	65.7339	7.1831	28.0099	5.19374	1.05079	0.670324	4.36312	3.87034
322	C0011	B	32	R	5	2	57	601.41		65.2675	16.8683	0.715574	6.06425	0.216401	2.71412	2.53326	2.1899	3.32389	0.106821		71.1034		16.4525	136.713	88.3944	12.2928	36.5386	64.3545	109.974	141.821	163.768	24.5952	109.825	12.5431			4.81479	0.880335	9.87749	517.421	31.0106	65.4513	6.78326	28.2473	4.88464	1.0113	0.683957	4.20844	4.02321
322	C0011	B	33	R	2	3	54	605.97		66.1952	17.0051	0.715968	6.68182	0.142232	0.88946	2.64826	2.32444	3.31479	0.0827009		76.4494		18.0567	147.288	91.6152	14.64	42.3392	61.3354	115.081	152.015	140.785	21.762	119.263	13.6705			5.89487	1.08076	10.3116	568.013	31.0953	64.9401	7.11056	28.9915	4.96445	1.05055	0.662535	4.16998	3.89486
322	C0011	B	35	R	4	3	54	628.171		65.8771	18.0394	0.753771	6.48907	0.108533	0.788242	2.40506	2.30626	3.16176	0.0707978		66.58	1.10673	15.3141	128.817	68.6714	12.8438	41.6384	72.2606	106.042	139.737	112.739	23.0257	109.458	12.8775	1.22482		2.9892	0.841741	13.4752	491.801	29.7878	65.9757	7.01876	27.1526	5.0731	1.03624	0.668203	4.39715	3.88714
322	C0011	B	36	R	2	0	50	634.665		66.6295	17.5808	0.760067	6.31977	0.118646	0.846952	2.34635	2.34486	2.9841	0.0689202		64.7815	1.20558	15.192	117.22	65.8233	13.0587	39.8467	68.5453	99.3813	130	115.411	20.8889	111.863	12.3198	1.21122		3.03241	0.861025	7.82049	470.087	28.4395	61.5952	6.64487	25.7886	4.85322	1.00278	0.644003	4.13292	3.73335
322	C0011	B	37	R	2	0	50	644.709		65.3696	16.917	0.714267	6.63606	0.185937	2.16332	2.48962	2.13871	3.29813	0.0873801		73.5589		16.5718	140.356	92.2326	14.1952	48.0551	64.5127	123.097	141.464	151.278	22.6469	109.998	12.8269			4.3286	1.23868	10.3187	525.13	30.4276	63.4115	6.59769	27.7437	4.75864	0.964243	0.66114	4.05161	3.82318
322	C0011	B	38	R	2	2	52	654.41		66.2123	17.4118	0.728842	6.39696	0.227775	0.927167	2.3908	2.10426	3.52456	0.0755159		65.5978		17.4602	135.262	72.7504	15.0171	38.1541	74.0128	106.81	133.319	129.89	22.0762	111.384	13.0938			2.12111		9.30695	508.544	30.347	64.3956	6.8487	27.624	5.47822	1.01657	0.640549	4.17378	3.90363
322	C0011	B	40	R	3	2	53	674.835		66.3404	17.6456	0.761502	6.29221	0.0798895	1.13093	2.34391	2.32652	3.00248	0.0765672		63.5119	1.10056	15.6255	128.429	66.5015	15.4246	42.3539	74.4275	102.902	129.072	116.437	24.6837	110.149	12.7315	1.60683		2.8277	1.15327	11.8404	475.524	28.8625	62.2795	6.91083	27.1276	5.18774	1.07461	0.711056	4.57549	4.09819
322	C0011	B	44	R	3	2	58	691.11		67.3942	16.7947	0.729748	5.91333	0.146729	1.57565	2.32159	2.06032	2.97992	0.0837869		57.7828	1.52357	15.3769	128.984	70.2126	14.4653	46.2288	71.0956	119.661	149.769	134.913	23.41	116.11	14.3431	1.19901		3.19285	0.811022	8.29074	478.811	31.1109	68.4346	7.53021	29.25	5.53902	1.13935	0.755566	4.74908	4.35182
322	C0011	B	45	R	3	2	53	700.3		66.3696	17.894	0.765005	6.36037	0.102292	0.786203	2.30742	2.1637	3.17486	0.0765148		61.8263	1.01706	15.0082	118.267	70.8068	16.665	43.925	66.648	103.705	130.514	108.106	21.1577	115.035	13.4483	1.4021		2.89553	0.851368	9.75884	442.461	29.9804	64.0977	6.95761	27.1139	5.08291	1.00619	0.647274	4.19783	3.6614
322	C0011	B	47	R	2	5	57	712.66		64.1457	18.5008	0.80009	7.18162	0.121429	1.35855	2.42715	1.84954	3.52836	0.086719		78.1013		18.3196	157.277	91.4488	13.2022	38.074	53.5346	138.053	154.526	143.474	25.8257	124.434	13.9912			5.50297	0.79365	11.5939	474.215	32.6809	71.1977	7.25451	31.4205	5.6188	1.11694	0.775017	4.74967	4.40741
322	C0011	B	48	R	3	30	83	722.835		64.3401	19.0608	0.820234	7.43583	0.0894466	0.903825	2.24782	1.71292	3.30571	0.0832726		67.247	1.17973	16.8096	133.617	87.3647	10.8269	34.9764	35.6284	124.895	148.859	101.428	26.4355	126.217	14.7056	1.99552		3.31257	0.811807	10.4534	422.904	36.8297	76.633	8.68668	33.9213	6.45984	1.27883	0.853328	5.49672	4.80291
322	C0011	B	52	R	6	2	55.5	763.36		67.5771	17.1939	0.745108	6.26864	0.0410044	0.87811	2.39748	1.77295	3.0584	0.0673633		60.3432		18.6977	147.659	76.3196	7.59855	14.9203	39.7201	85.1164	140.395	116.083	23.5053	121.248	13.6143					11.055	379.083	32.5288	67.6413	7.51944	30.1697	6.0373	1.0873	0.708033	4.6047	4.05817
322	C0011	B	56	R	2	5	58	844.579		65.888	17.692	0.776588	6.93141	0.044837	1.25679	1.86943	1.92085	3.53463	0.085401		48.0101	1.11077	14.7171	117.919	73.7747	12.1176	37.9052	36.1764	103.396	146.12	109.229	25.3637	120.693	13.7255	4.05066		3.41766	1.03967	9.40441	316.273	31.7001	68.4502	7.66789	29.9772	5.76287	1.13615	0.760859	4.89791	4.31586
[truncated: 9 more columns]

## Sheet: Table S1B, C0012 sample data
Table S1B: Chemical concentration data for Site C0012. "mbsf" is "meters below seafloor". "Wt. %" is "weight percent". "ppm" is "parts per million". Empty cells are for concentrations less than the detection limit. Data are overspecified for calculation purposes.
Leg	Site	Hole	Core	Type	Section	Top (cm)	Bottom (cm)	Depth		SiO2	Al2O3	TiO2	Fe2O3	MnO	CaO	MgO	Na2O	K2O	P2O5		Li	Be	Sc	V	Cr	Co	Ni	Cu	Zn	Rb	Sr	Y	Zr	Nb	Mo	Cd	Sn	Sb	Cs	Ba	La	Ce	Pr	Nd	Sm	Eu	Tb	Gd	Dy
								(mbsf)		wt%	wt%	wt%	wt%	wt%	wt%	wt%	wt%	wt%	wt%		ppm	ppm	ppm	ppm	ppm	ppm	ppm	ppm	ppm	ppm	ppm	ppm	ppm	ppm	ppm	ppm	ppm	ppm	ppm	ppm	ppm	ppm	ppm	ppm	ppm	ppm	ppm	ppm	ppm
333	C0012	D	1	H	2	0	19	0.595		59.9399	15.4193	0.668226	6.05858	0.0779597	9.36073	2.29981	3.5416	2.52812	0.105802		42.31	1.62	14.11	111.205	53.46	11.46	29.57	43.795	71.06	82.57	338.07	20.44	95.89	8.15	0.82	0.03	1.65	0.54	5.43	607.283	19.54	39.26	4.84	18.21	3.94	0.95	0.58	3.75	3.41
333	C0012	C	2	H	4	50	70	8.962		59.6135	15.1147	0.621154	5.87795	0.0575142	9.81193	2.59964	3.14028	3.05976	0.103526		61.32	1.83	12.51	112.76	67.36	10.84	30.255	37.76	83.07	102.15	334.207	19.47	102.705	8.84	0.56	0.03	1.84	0.69	7.85	466.608	22.15	44.45	5.28	19.345	3.98	0.87	0.56	3.63	3.23
333	C0012	C	2	H	6	58	78	11.719		63.0485	17.14	0.710045	6.65813	0.0582004	3.13118	2.8751	2.9915	3.29415	0.0931207		78.39	2.08	13.685	113.61	72.58	13.54	42.145	53.125	91.95	116.22	177.88	21.25	103.97	10.25	0.82	0.03	2.28	0.75	8.83	533.375	23.51	51.09	5.81	22.39	4.41	0.98	0.62	4	3.46
333	C0012	C	2	H	7	68	70	13.141		62.4389	17.3906	0.744149	6.2179	0.0659288	3.21982	2.84819	3.74392	3.22326	0.107338		74.2156	1.99013	15.1101	125.782	65.7289	12.5715	39.2934	74.4223	107.306	110.516	185	23.0043	117.565	11.3731	0.987328	0.0872892	2.53357	1.10698	7.45604	588.279	25.9641	53.5659	6.24955	22.9819	4.68256	1.04664	0.662944	4.22695	3.88428
333	C0012	C	3	H	3	55	75	17.16		63.1806	15.8589	0.720102	6.4643	0.0997064	4.74159	2.41511	3.84424	2.55913	0.116324		57.88	1.67	17.76	103.68	55.99	12.94	39.205	46.955	100.7	83.92	215.537	29.38	96.305	8	1.4	0.08	1.87	0.88	6.87	445.273	19.99	42.74	5.14	20.84	4.5	1.11	0.75	4.6	4.53
333	C0012	C	3	H	6	49	51	21.116		64.3103	17.2551	0.730263	6.6163	0.0583599	1.19853	2.94841	3.40908	3.37729	0.0963794		77.0954	2.24813	14.805	140.265	73.1778	13.0719	43.4487	87.083	109.931	123.968	126.991	22.538	120.959	12.0956	0.735801	0.118245	2.5523	1.102	9.94562	633.111	26.3707	54.9357	6.32063	23.1544	4.61269	1.03147	0.647315	4.19908	3.80396
333	C0012	C	4	H	4	0	20	27.483		64.643	17.2378	0.705156	5.8561	0.0661084	2.47907	2.60026	3.18422	3.14015	0.0881446		78.19	2.26	15.235	118.45	88.93	11.77	36.77	82.47	103.78	102.54	155.56	21.52	111.13	10.66	0.64	0.04	2.32	0.83	9.08	579.655	24.35	49.44	5.87	21.22	4.4	1	0.64	4.11	3.74
333	C0012	C	4	H	8	80	82	32.228		63.0023	17.053	0.70764	5.93966	0.0774115	3.85602	2.6846	3.55113	3.06099	0.0671918		86.4614	2.02843	14.6839	124.245	62.4207	11.7828	34.172	65.4795	103.312	119.796	194.643	22.3924	111.501	11.3051	0.457465	0.0599811	2.45941	0.851766	7.04734	592.516	24.9831	64.6026	5.89108	22.7957	4.34145	0.967504	0.632667	3.96764	3.6745
333	C0012	C	5	H	3	0	21	35.729		64.1436	17.7154	0.736225	7.0344	0.0575175	1.11009	2.75509	2.93339	3.40504	0.109283		78.98	2.37	15.65	119.245	69.63	24.12	84.025	68.59	117.63	126.92	115.99	25.27	115.015	12.13	1.84	0.06	2.66	1.64	9.41	573.878	27.9	62.73	6.77	27.305	5.14	1.11	0.7	4.69	4.17
333	C0012	C	6	H	4	0	21.5	46.451		65.0723	17.0877	0.723473	6.28732	0.0574185	1.83739	2.70441	3.02021	3.12356	0.0861277		69.77	2.12	14.07	118.925	80.95	10.01	33.355	64.43	85.1	105.78	137.083	19.12	100.495	10.22	0.65	0.07	2.14	0.67	8.18	555.543	23.94	48.71	5.61	20.25	4.11	0.91	0.57	3.72	3.26
333	C0012	C	7	H	3	46	48	54.478		64.2598	18.1905	0.748673	5.80956	0.0787764	1.81478	2.66008	2.99082	3.38358	0.0634308		75.3313	2.37593	15.4595	122.803	69.6881	12.8295	36.5228	56.6425	104.746	146.693	138.193	20.3394	118.673	12.3466	0.537278	0.0716099	2.83902	0.974002	9.59308	606.907	27.7445	58.0411	6.26814	23.9489	4.63983	0.993748	0.631466	4.0272	3.60967
333	C0012	C	8	H	4	0	21	63.946		60.6579	17.1373	0.707504	6.09542	0.350729	6.07123	2.67279	2.95096	3.25331	0.1028		76.76	2.25	13.585	99.48	60.64	12.14	45.09	90.795	105.79	123.98	253.293	25.64	100.07	11.55	0.4	0.03	2.47	1.09	8.46	635.29	28.03	62.06	6.77	27.15	4.99	1.11	0.7	4.66	4.17
333	C0012	C	9	H	4	0	20.5	73.76		63.8782	17.747	0.722102	6.25451	0.122202	1.89968	2.68289	3.25501	3.355	0.0833194		76.81	2.37	14.755	123.545	82.95	13.9	49.69	83.255	93.18	115.55	138.623	18.71	108.89	11.67	0.58	0.03	2.35	0.88	8.95	620.675	26.05	50.72	6.19	22.175	4.49	0.97	0.6	3.96	3.36
322	C0012	A	5	R	2	27	46	89.695		63.9544	17.8562	0.734987	6.25212	0.425389	2.12029	2.63694	2.50545	3.42534	0.0888819		75.941		17.4722	138.417	76.3049	11.2827	28.7843	66.9162	95.9945	132.696	161.658	23.4845	100.841	12.3212					9.06993	600.184	29.2596	59.9999	6.74486	27.0983	5.23182	0.997497	0.636555	4.12854	3.76358
333	C0012	C	11	H	6	0	21	91.497		62.7059	17.4047	0.703557	6.6447	0.591881	2.93149	2.69138	2.84773	3.39494	0.0837568		70.19	2.3	14.785	110.91	71.11	12.2	40.55	60.515	87.56	115.52	173.457	27.69	107.315	10.96	0.44	0.03	2.35	0.68	8.09	625.432	25.56	54.19	6.19	23.91	4.72	1.06	0.71	4.49	4.16
322	C0012	A	6	R	3	12	33	100.47		64.0506	18.1685	0.719052	6.09604	0.207098	2.22365	2.5439	2.69338	3.21923	0.0785219		74.9339	1.14681	13.8273	113.131	74.6761	12.1288	41.6981	64.413	102.935	135.542	150.416	22.732	112.665	13.9092	1.06132		2.90728	0.926765	10.9858	497.629	28.6139	62.3699	6.70567	26.1758	4.90624	0.992215	0.645024	4.20023	3.6983
322	C0012	A	7	R	5	90	108	107.655		64.0412	17.4829	0.735673	6.10686	0.150077	2.28229	2.7225	2.66759	3.72282	0.088059		74.1432		16.2376	146.98	105.507	14.6287	45.9119	83.5421	123.851	141.049	151.819	23.4042	102.813	12.5735			4.72956	1.29462	10.4119	627.205	29.6733	62.4137	6.48508	27.9827	4.73283	0.98143	0.670585	4.16744	3.89088
333	C0012	C	14	H	2	0	26.5	108.309		60.453	16.9436	0.681329	5.70763	0.310782	7.87115	2.28305	2.42649	3.19149	0.131485		67.74	2.14	13.045	107.91	64.29	12.29	45.81	62.67	93.7	109.06	281.373	22.63	101.535	10.26	0.52	0.03	2.24	1.08	8.08	558.885	24.13	51.84	5.83	22.315	4.37	0.97	0.62	3.99	3.55
322	C0012	A	8	R	5	3	23.5	116.65		64.1334	17.3072	0.710243	6.12642	0.238284	3.00774	2.52362	2.52367	3.34635	0.0830029		75.6659		17.7031	126.547	74.4162	12.6929	37.621	62.0812	95.8836	136.192	171.66	22.6438	98.9075	12.5742			6.74295		13.0025	595.68	28.9128	60.3284	6.69012	26.6448	5.19562	0.973936	0.631366	3.97964	3.65241
333	C0012	C	15	H	4	0	29.5	119.321		60.882	16.5508	0.660893	5.65747	0.592525	7.3382	2.35301	2.50684	3.2247	0.233592		68.5	2.25	13.595	106.725	57.85	12.26	37.615	64.145	90.12	111.59	288.683	27.56	106.72	10.47	0.8	0.05	2.27	1.22	8.07	700.525	27.12	59.58	6.36	26.19	4.91	1.1	0.72	4.75	4.29
333	C0012	D	2	H	3	0	26.5	119.507		64.571	17.22	0.696094	5.9168	0.143638	2.97221	2.36451	2.66284	3.38103	0.0718192		72.38	2.37	13.97	113.51	77.74	11.21	41.565	71.095	95.34	118.68	180.557	20.65	106.945	11.2	0.93	0.02	2.38	0.79	10.29	562.327	25.8	53.35	6.1	23.22	4.39	0.97	0.6	3.9	3.38
322	C0012	A	9	R	4	2	23	124.05		64.8584	17.5023	0.71894	6.27979	0.121906	1.79459	2.54381	2.73937	3.36778	0.0730403		64.6476	1.15128	14.4993	115.121	75.4006	13.6103	51.0469	65.827	99.7754	133.445	141.374	20.1814	100.678	12.2358	1.19625		2.85824	0.933196	8.06548	560.004	28.6223	59.5655	6.60526	25.5706	4.76211	0.991318	0.614806	4.03206	3.52794
333	C0012	D	3	H	3	0	28.5	129.198		62.8912	17.209	0.698041	6.32177	0.225175	3.94618	2.57262	2.88223	3.1637	0.0900698		67.61	2.25	15.11	117.5	68.47	14.03	48.455	90.67	104.61	115.44	199.267	24.19	108.45	10.6	1.05	0.05	2.31	1.18	8.63	608.52	25.32	55.11	6.09	23.32	4.49	1.02	0.67	4.26	3.86
333	C0012	D	4	H	4	0	29.5	137.291		64.9188	16.6843	0.691694	6.42606	0.36816	2.02488	2.51576	2.74446	3.54772	0.0780945		62.21	2.37	15.1	124.55	84.47	13.45	37.705	72.84	102.99	107.95	147.09	20.53	108.62	10.87	0.43	0.03	2.3	0.96	9.7	622.177	26.07	52.4	6.02	21.465	4.29	0.94	0.6	3.86	3.46
333	C0012	D	4	H	6	96	98	139.538		66.2576	16.8931	0.71925	6.34645	0.131199	0.973596	2.50645	2.76263	3.33084	0.0789315		106.565	2.37001	15.5565	132.875	64.1374	11.0148	34.4192	58.427	95.8064	129.448	118.047	21.1986	119.395	11.7743	0.337092	0.0311604	2.55743	0.762356	9.01214	617.216	27.0231	63.3062	6.2342	24.4194	4.54346	0.979302	0.618835	3.91812	3.60327
333	C0012	D	5	H	4	0	30	144.358		65.9545	17.1411	0.704807	6.2882	0.264303	1.11227	2.52739	2.41176	3.52404	0.071582		63.57	2.52	14.635	123.145	71.78	14.26	44.27	79.35	105.49	128.73	131.563	24.75	118.665	12.33	0.57	0.04	2.56	1.31	9.73	561.49	27.9	62.05	6.53	25.995	4.72	1.03	0.66	4.34	3.9
333	C0012	D	7	H	3	0	29	154.564		66.0269	17.418	0.708004	6.11206	0.0774379	0.95138	2.45589	2.65501	3.52896	0.0663754		64.64	2.49	14.81	127.67	74.91	10.91	31.185	72.45	97.28	128.42	124.88	19.59	112.78	12.08	0.61	0.03	2.58	0.84	9.26	513.693	20.67	57.73	5.24	20.08	3.91	0.86	0.56	3.53	3.2
322	C0012	A	13	R	2	27	47	159.91		64.0776	16.3601	0.689581	6.11387	0.468184	3.92741	2.44001	2.44785	3.38964	0.0858123		60.6777		18.2717	152.735	68.0726	11.5406	18.644	96.1205	97.3538	124.967	211.422	30.6257	92.6436	11.4947			9.20079		9.31662	601.936	29.1771	61.6861	6.75741	27.2689	5.46838	1.0624	0.742859	4.66482	4.67545
333	C0012	D	8	H	4	0	29.5	160.269		65.5332	17.1544	0.719307	6.10321	0.130783	1.76012	2.49578	2.53937	3.47665	0.0871887		60.28	2.58	17.46	159.665	69.12	12.07	41.67	104.595	117.53	132.71	166.07	27.26	115.83	12.18	0.81	0.05	2.64	1.59	10.31	655.23	29.42	63.32	6.96	27.865	5.13	1.11	0.71	4.71	4.2
333	C0012	D	10	H	3	0	31	168.341		65.6662	17.241	0.696883	6.07989	0.175593	1.65167	2.48025	2.44732	3.4899	0.0713345		66.83	2.4	14.605	124.74	74.58	15.56	50.025	84.185	104.34	115.75	141.297	17.68	104.62	10.36	0.75	0.03	2.18	1.18	8.53	644.266	23.51	47.84	5.56	19.95	3.96	0.87	0.55	3.57	3.15
333	C0012	D	11	H	2	0	30	171.283		66.7158	16.5902	0.672131	6.16393	0.131148	1.45902	2.34973	2.60109	3.2459	0.0710383		55.8	2.33	14.795	119.795	67.99	13.75	48.845	66.735	98.34	122.85	153.16	21.84	111.11	11.12	0.78	0.03	2.4	0.99	8.76	474.562	25.45	56.05	6.04	22.91	4.36	0.94	0.6	3.88	3.38
333	C0012	D	13	H	4	0	31	178.66		64.8182	16.8314	0.692467	6.08701	0.122857	3.27246	2.28961	2.92623	2.87039	0.0893505		64.58	2.01	17.345	125.015	53.98	10.45	29.825	59.51	85.81	100.81	221.39	23.5	104.365	9.65	0.54	0.04	2.02	0.73	7.37	331.697	22.93	52	5.68	23.54	4.59	1.03	0.67	4.3	4.03
322	C0012	A	17	R	3	0	27	198.815		65.8599	17.6241	0.699751	6.02709	0.0717091	1.21259	2.36184	2.69203	3.38187	0.0691716		56.6393	1.13879	14.0721	117.334	65.1435	15.852	47.1865	66.0733	96.3079	127.669	156.653	20.3827	97.873	11.8109	1.19355		2.76296	0.864762	8.34626	321.53	26.6025	58.2544	6.31522	24.4984	4.63469	0.93683	0.613537	3.97186	3.51014
322	C0012	A	18	R	2	26	48	208.16		64.7154	18.2552	0.739394	6.35772	0.0878657	1.55504	2.5199	2.37673	3.30946	0.0833442		73.7658	1.1037	14.9497	122.072	67.2468	11.2809	36.4033	75.4094	103.606	126.85	122.308	23.559	98.4429	11.5533	1.07517		2.85835	0.819863	9.54774	304.292	27.2554	58.9584	6.41363	25.4076	4.83858	1.00205	0.668567	4.29225	3.93059
322	C0012	A	20	R	2	17	19	226.77		65.8142	17.6453	0.728552	6.30648	0.0965059	0.919999	2.45589	2.26879	3.68184	0.0823827		72.6865	2.46328	13.7733	128.57	64.6316	8.29922	26.2005	61.0337	111.998	155.088	110.22	20.6363	116.292	12.0683	0.945221	0.11136	2.66824	1.04274	9.85875	628.318	27.1024	62.7722	6.18829	23.5319	4.45234	0.989983	0.622887	4.01463	3.61892
322	C0012	A	23	R	3	0	30	256.1		66.0775	17.3259	0.75924	6.33632	0.116347	0.901175	2.54061	2.24332	3.62391	0.0757046		83.0414		19.3804	155.275	68.5713	12.18	32.0824	76.8744	102.56	138.832	130.18	21.6589	101.845	12.1822			7.83766		12.3398	535.728	28.482	59.4075	6.75534	26.5238	5.11415	0.949777	0.619819	3.87522	3.59208
322	C0012	A	24	R	2	2	34	263.95		64.7541	18.1642	0.754439	6.47343	0.222218	1.69103	2.5191	2.09678	3.24059	0.0841048		72.5573	1.11972	17.1078	141.009	67.8004	11.3264	36.2534	67.696	98.4224	133.693	133.29	21.7356	101.751	11.7869	1.27297		2.76083	0.829866	9.53829	761.781	28.0945	60.8028	6.61949	25.7999	4.83085	1.05564	0.656293	4.24164	3.80185
322	C0012	A	25	R	2	27	57	274.185		66.6817	17.5058	0.734084	6.18545	0.113919	1.01853	2.30035	2.15971	3.21915	0.0813293		64.5322	1.07041	14.4668	117.029	70.7067	12.1427	37.4003	60.3439	101.747	138.682	113.456	21.0413	104.78	12.9434	1.2433		3.03775	0.75638	12.2189	489.88	29.6496	65.9476	6.90893	26.8353	4.95006	0.987449	0.634933	4.17314	3.60926
322	C0012	A	27	R	2	2	33.5	292.055		66.1637	17.1259	0.704173	6.28514	0.19422	1.89992	2.28164	2.27435	2.98845	0.0825292		64.6856	1.05662	14.9422	113.672	62.6425	14.22	47.3112	60.1305	105.824	134.432	147.639	24.3993	104.99	12.2473	1.23015		3.08387	0.791494	10.9337	478.452	28.6531	61.5934	6.73476	26.4187	5.04022	1.03812	0.689638	4.4196	4.00021
322	C0012	A	29	R	4	40	42	313.655		63.7401	16.2183	0.696097	5.75957	0.208614	6.16075	2.14994	1.91606	3.03118	0.11936		58.9489	2.1026	13.6758	99.1232	55.8489	9.10808	30.7757	50.2805	102.727	113.419	275.108	23.3376	110.297	11.4897	0.309928	0.0453238	2.41483	0.689543	7.47447	330.545	26.2788	58.0588	6.29574	22.9075	4.57704	1.00989	0.667933	4.23109	3.95175
322	C0012	A	32	R	2	0	41	340.13		64.3198	17.5605	0.802574	6.22872	0.126214	4.13426	2.11177	2.11435	2.53507	0.0667324		59.4168	1.14903	22.9537	183.849	59.7789	26.6553	62.8874	110.33	95.8665	105.652	223.876	18.7488	89.4538	10.2088	1.97586		2.42955	1.44621	7.99135	661.381	21.9138	48.064	5.30237	20.8809	4.00167	0.902937	0.553501	3.55365	3.24774
322	C0012	A	33	R	2	2	42	349.23		67.2193	16.151	0.678649	5.25476	0.150045	3.3535	2.10501	2.10334	2.90361	0.0807829		64.2622		17.7508	126.226	60.1333	9.4167	18.8724	64.2262	106.768	114.863	230.76	27.4458	102.269	12.7113			1.38051		8.12124	972.687	28.1849	58.8441	6.46633	26.6215	5.51747	1.04808	0.710205	4.57174	4.37142
322	C0012	A	34	R	3	2	44	359.56		65.7412	17.5313	0.72833	6.34722	0.128801	2.26132	2.28999	1.82672	3.08226	0.0628461		69.5082	1.081	14.5443	112.146	67.5454	13.1613	39.7284	59.0399	98.459	127.251	137.35	20.6446	107.46	13.1164	1.26218		2.91471	0.891264	9.51262	343.101	28.9684	61.6519	6.79214	26.1358	4.9171	0.966865	0.643812	4.20194	3.66284
322	C0012	A	35	R	2	25	65	367.06		68.0199	16.5639	0.725104	5.84865	0.113627	1.63134	2.04995	2.14741	2.81383	0.086281		64.7984	1.14312	14.7649	114.081	58.15	12.5893	36.8678	62.6121	94.7561	117.307	155.05	23.4364	105.264	12.5907	1.48259		2.72832	0.746898	9.14218	674.59	26.8554	58.8314	6.44549	25.4732	4.94936	1.05342	0.677335	4.34765	4.01418
322	C0012	A	36	R	2	0	34	376.17		66.63	17.5751	0.757605	6.32223	0.113545	1.32283	2.26762	1.70647	3.22404	0.080604		69.1482		17.3537	131.205	69.8279	11.8098	25.4798	59.1749	93.8315	129.214	123.085	23.2332	108.178	13.1485			3.20631		9.14158	388.153	30.0304	62.4696	6.8528	27.7217	5.54549	1.03358	0.669597	4.28669	3.95421
322	C0012	A	37	R	2	2	39	386.32		64.237	17.9374	0.770156	6.47077	0.124485	3.31244	2.10084	1.66749	3.27753	0.10185		76.4363		16.6273	140.664	92.8527	11.2096	31.2659	57.422	155.067	135.802	162.126	24.0823	108.864	12.7711			5.13844	0.858306	10.1648	355.21	30.0351	64.1203	6.84906	27.8848	5.02251	1.04572	0.70429	4.36637	4.0511
322	C0012	A	39	R	3	0	35	406.9		64.1391	19.1785	0.862728	7.31355	0.0584107	1.05648	2.2282	1.4554	3.60268	0.104956		87.8305		19.857	160.64	85.4985	11.287	23.584	33.9171	106.654	150.484	111.833	24.0745	132.188	15.2565			17.4154		12.7545	345.737	34.6841	71.3968	8.21981	32.5613	6.4129	1.11485	0.739136	4.68371	4.28583
322	C0012	A	42	R	2	31	71.5	434.255		65.4453	16.9798	0.744586	7.63543	0.0829938	1.67819	2.42214	1.73488	3.16327	0.113406		70.366		19.8491	137.077	63.8713	15.421	29.615	62.3148	100.107	133.552	119.301	26.3052	106.179	11.4989			8.27854		11.1276	309.592	27.8187	58.6395	6.76858	27.2897	5.63162	1.08073	0.71366	4.57413	4.24907
322	C0012	A	47	R	2	0	30	480.77		60.2713	12.8425	0.55941	6.19103	0.486719	13.3058	2.19598	1.65696	2.32833	0.162011		39.1131	1.15335	12.7424	76.9941	32.2135	11.4248	27.9503	41.3644	78.8336	94.9024	302.694	28.3034	86.2651	7.17419	0.650926		1.77303	0.512668	6.49117	487.404	23.7954	42.6422	5.37585	21.9766	4.55088	1.06	0.701293	4.44458	4.20176
322	C0012	A	49	R	2	0	37	499.925		57.5247	14.2998	0.608699	7.36087	0.430179	12.1529	2.87563	1.54047	3.04347	0.163281		50.8127		16.1988	129.178	55.5001	19.0224	32.9701	77.4724	103.839	107.796	396.863	24.3195	84.4437	7.4807			1.36255	1.48731	6.85942	599.853	27.7342	54.2501	6.10479	26.6101	5.01276	1.09741	0.69914	4.41026	4.00079
333	C0012	G	1	R	3	0	49	516.59		54.0315	14.3945	0.642666	9.71735	0.416543	12.8652	2.96935	1.07111	3.65367	0.238024		34.88	1.93	14.795	99.89	37.57	23.89	58.185	84.53	114.5	92.22	382.023	32.73	97.425	7.65	0.48	0.02	1.76	1.02	7.1	736.38	32.68	62.12	7.75	32.885	6.4	1.51	0.96	6.32	5.63
[truncated: 9 more columns]

## Sheet: Table S2A, C0011 EMP
Table S2A: Chemical composition of glass separated from ash layers at Site C0011 as determined by electron microprobe. "mbsf" is "meters below seafloor". "Wt. %" is "weight percent". Data are overspecified for calculation purposes.
Leg	Site	Hole	Core	Type	Section	Top (cm)	Bottom (cm)	Depth		SiO2	Al2O3	TiO2	Fe2O3	MnO	CaO	MgO	Na2O	K2O	P2O5
								mbsf		wt%	wt%	wt%	wt%	wt%	wt%	wt%	wt%	wt%	wt%
333	C0011	C	2	H	6	53	55	8.077		78.572	12.4953	0.191172	0.863519	0.0445704	1.24664	0.200333	3.57342	2.79096	0.0221225
333	C0011	C	2	H	6	71	73	8.25		77.4653	12.8038	0.293628	1.52433	0.110298	1.77613	0.291081	3.99287	1.70746	0.0350367
333	C0011	D	1	H	7	2	4	26.733		78.8206	12.0803	0.272374	1.25424	0.0673587	1.39711	0.280174	3.90688	1.87946	0.0415186
333	C0011	D	2	H	1	80	82	31.278		77.752	12.4495	0.206638	0.929592	0.0571081	1.08259	0.166238	3.23582	4.09326	0.0272505
333	C0011	D	2	H	4	74	76	35.338		78.0401	12.6462	0.114286	1.03902	0.0598097	1.19663	0.108444	3.73444	3.04161	0.0194766
333	C0011	D	4	H	2	53	55	50.549		77.4568	12.887	0.0685002	0.924959	0.0717678	0.918033	0.073998	3.36361	4.21968	0.0155971
333	C0011	D	5	H	1	41	43	55.892		76.5776	13.1569	0.0886649	1.31223	0.0508992	0.941386	0.0501956	3.69556	4.10633	0.0202119
333	C0011	D	5	H	7	4	6	62.295		73.2469	14.2915	0.165588	2.38151	0.081689	1.76213	0.14831	3.77489	4.12388	0.0236565
333	C0011	D	6	H	2	91	93	67.209		77.0274	12.9092	0.0751213	1.20922	0.0450615	0.852554	0.0226966	3.79736	4.04869	0.0126791
333	C0011	D	6	H	3	72	74	68.363		77.1348	12.8567	0.0738617	1.18481	0.0588732	0.714078	0.0281405	3.67013	4.26548	0.0130743
333	C0011	D	6	H	6	20	22	70.553		77.9857	12.6713	0.164327	0.860829	0.069623	1.10614	0.1991	3.41081	3.50342	0.028771
333	C0011	D	7	H	1	135	137	75.132		77.1454	13.106	0.185272	0.893892	0.0903038	1.0495	0.210556	3.79675	3.49664	0.0256231
333	C0011	D	7	H	5	53	55	76.823		78.5578	12.0689	0.302698	1.85136	0.0680982	1.84241	0.279674	3.88014	1.12177	0.0271907
333	C0011	D	10	H	7	106	108	98.164		76.6941	12.3346	0.445007	2.63792	0.152705	2.36779	0.437355	4.00869	0.871783	0.0499756
333	C0011	D	12	H	6	81	83	115.236		74.5939	13.1117	0.5752	3.04018	0.173965	3.08698	0.642783	3.88613	0.793009	0.0961158
333	C0011	D	14	H	3	108	110	128.392		78.1604	12.3845	0.295348	1.88892	0.117739	2.03318	0.283303	3.94008	0.869905	0.0266454
333	C0011	D	14	H	8	53	55	132.873		78.2279	12.4103	0.193008	0.978395	0.1146	0.985286	0.164655	3.71596	3.18699	0.0229091
333	C0011	D	15	H	6	91	93	139.93		76.0858	12.8116	0.397745	2.69254	0.151786	2.60626	0.406452	3.83355	0.966719	0.0474761
333	C0011	D	16	H	5	30	32	146.524		76.1861	13.067	0.243855	1.84124	0.0774161	1.53176	0.201756	3.80114	3.02379	0.0259303
333	C0011	D	18	H	6	107	109	163.969		77.1176	13.1155	0.242909	1.16856	0.0980538	1.69046	0.293417	3.73995	2.49586	0.0376221
333	C0011	D	19	H	1	132	134	169.042		74.7167	13.4513	0.453675	2.99313	0.149862	2.96562	0.536117	3.84454	0.819466	0.0696156
333	C0011	D	19	H	1	74	76	168.584		75.609	13.0114	0.42963	2.71536	0.120246	2.85688	0.493001	3.95663	0.736137	0.0716926
333	C0011	D	20	H	6	71	73	180.018		77.3329	12.8293	0.0668047	0.794051	0.0494372	0.51578	0.041838	3.52242	4.83526	0.0121856
333	C0011	D	21	H	5	79	81	183.419		77.0864	13.0422	0.136168	1.37882	0.0679703	1.21305	0.118012	3.81434	3.11726	0.0257256
333	C0011	D	22	H	2	26	28	184.912		76.3458	13.1492	0.129228	1.70146	0.0628092	1.26289	0.0978559	3.7303	3.50683	0.0136377
333	C0011	D	26	X	2	80	82	206.33		78.6349	12.2924	0.225838	1.5357	0.0706021	1.8228	0.245414	3.67185	1.47271	0.0277709
333	C0011	D	28	X	4	65	67	219.518		77.313	12.6068	0.253828	1.98534	0.0943326	1.98258	0.24174	4.12739	1.35908	0.0359158
333	C0011	D	28	x	4	73	75	219.593		77.3117	12.6794	0.258342	1.9501	0.0832421	2.02751	0.259351	4.12944	1.26495	0.0359693
333	C0011	D	28	X	4	81	83	219.667		77.1661	12.8324	0.266971	1.99253	0.064754	2.07382	0.258413	4.08739	1.23041	0.0271942
333	C0011	D	28	X	2	15	17	216.449		75.5543	13.7512	0.205231	1.33622	0.0875347	1.41154	0.257892	4.06759	3.30049	0.0280798
333	C0011	D	28	X	4	51	53	219.389		77.5412	12.5036	0.26316	1.98324	0.0840106	2.05127	0.286082	4.02345	1.23951	0.0244229
333	C0011	D	28	X	4	84	86	219.695		77.3198	12.5765	0.301876	1.9806	0.123188	2.13021	0.302693	3.9443	1.28404	0.0367937
333	C0011	D	29	X	3	66	68	222.96		78.2622	12.5088	0.168024	0.812837	0.00690799	1.03386	0.180883	3.54964	3.44337	0.0334772
333	C0011	D	32	X	1	61	63	242.047		78.1665	12.1955	0.159645	1.3477	0.051426	1.47537	0.143544	3.22944	3.21153	0.0192964
333	C0011	D	32	X	5	105	106	245.488		78.1702	12.3241	0.24409	2.09391	0.109138	1.98402	0.208846	4.01283	0.817876	0.0349739
333	C0011	D	33	X	2	103.5	105.5	248.745		77.2299	12.3247	0.352942	2.54787	0.110768	2.50396	0.347333	3.67926	0.850123	0.0531468
333	C0011	D	34	X	1	0	2	251.5		78.7175	11.9021	0.249974	1.44597	0.0756297	1.63795	0.254898	3.76298	1.93926	0.013676
333	C0011	D	36	X	CC	16	18	275.161		79.2678	11.8664	0.260308	1.33501	0.0920724	1.36637	0.287398	3.66235	1.82513	0.0371825
333	C0011	D	38	X	5	9	11	286.365		78.7832	12.2466	0.158103	0.957631	0.0491843	1.20175	0.148213	3.15796	3.28014	0.0172925
333	C0011	D	39	X	3	80	82	295.461		77.4056	12.448	0.235312	1.13541	0.0461454	1.0301	0.184371	3.58536	3.90764	0.022032
333	C0011	D	41	X	1	57	59	311.57		77.0143	12.7698	0.286708	1.33733	0.100647	1.6758	0.31595	3.57309	2.90074	0.0256989
333	C0011	D	42	X	3	83	85	323.464		78.6277	12.4832	0.139033	0.761938	0.0595071	1.01816	0.166886	3.65899	3.06244	0.0221697
333	C0011	D	43	X	CC	0.5	2.5	334.168		78.3745	12.4595	0.150562	0.861166	0.0647143	1.01732	0.157419	3.60773	3.28876	0.0183513
333	C0011	D	44	X	3	17	19	337.008		78.4094	11.9734	0.234371	1.0011	0.0467267	0.907851	0.169634	3.45577	3.7837	0.0180427
333	C0011	D	47	X	1	16	18	349.621		78.083	12.4739	0.220128	1.26505	0.0804655	1.51488	0.190583	3.51573	2.61972	0.0365823
333	C0011	D	47	X	7	53	55	353.811		77.7487	12.4818	0.217146	1.45898	0.070152	1.47912	0.225021	3.44643	2.8298	0.0428578
333	C0011	D	49	X	CC	17	21	364.83		78.008	12.6911	0.202335	1.24556	0.0753376	1.51695	0.221419	3.56607	2.45326	0.0200009
333	C0011	D	51	X	CC	54	56	374.51		78.579	12.5163	0.135365	0.753332	0.0907692	1.03433	0.163448	3.71281	2.98707	0.027662
333	C0011	D	52	X	1	98	100	375.98		76.2051	15.1302	0	0.0300163	0.0230685	1.01162	0.170526	3.7769	3.65251	0
322	C0011	B	57	R	3	108	110	850.3		77.1292	14.5436	0	0.0615281	0.00570022	3.12711	0.123253	3.85966	1.14068	0.00931722
322	C0011	B	57	R	3	87	89	850.09		76.9953	14.572	0	0.031214	0.02325	2.61378	0.111178	4.34642	1.30489	0.00196218
322	C0011	B	59	R	1	64	66	866.04		77.4909	14.3903	0	0.0817169	0.0253259	3.12144	0.0774023	3.45792	1.34079	0.0142669

## Sheet: Table S2B, C0012 EMP
Table S2B: Chemical composition of glass separated from ash layers at Site C0012 as determined by electron microprobe. "mbsf" is "meters below seafloor". "Wt. %" is "weight percent". Data are overspecified for calculation purposes.
Leg	Site	Hole	Core	Type	Section	Top (cm)	Bottom (cm)	Depth		SiO2	Al2O3	TiO2	Fe2O3	MnO	CaO	MgO	Na2O	K2O	P2O5
								mbsf		wt%	wt%	wt%	wt%	wt%	wt%	wt%	wt%	wt%	wt%
333	C0012	C	1	H	1	119	121	1.12		77.8001	12.4428	0.261705	1.29696	0.0575652	1.60093	0.25824	3.75266	2.50039	0.0286623
333	C0012	C	1	H	3	57	59	3.173		77.9695	12.2781	0.298193	1.81862	0.152443	1.9821	0.315558	4.06993	1.08783	0.0277184
333	C0012	C	1	H	3	116	118	3.728		70.2286	14.4319	0.628145	3.93662	0.12069	3.40331	0.729925	3.75014	2.65735	0.113376
333	C0012	C	2	H	3	41	43	7.55		78.0734	12.2801	0.199589	0.894037	0.0450653	1.04454	0.163811	3.18759	4.09475	0.0171259
333	C0012	C	2	H	6	101	103	12.125		78.64	12.0553	0.241649	1.54456	0.0901982	1.45689	0.229512	4.27353	1.43938	0.0289527
333	C0012	C	3	H	2	135	137	16.591		77.1528	12.9782	0.0487561	1.01676	0.0580764	0.603304	0.0234715	3.44869	4.64772	0.0221737
333	C0012	C	3	H	4	71	73	18.651		77.9745	12.4085	0.297736	2.08057	0.183369	2.19676	0.310388	4.01966	0.492746	0.035721
333	C0012	C	3	H	5	42	44	19.719		77.1179	12.4697	0.325024	2.3406	0.141672	2.32619	0.337019	4.10584	0.791441	0.0445948
333	C0012	C	4	H	3	123	125	27.3		67.8083	14.3811	0.785265	5.71329	0.201876	5.31647	1.40298	3.61111	0.632029	0.147599
333	C0012	C	5	H	5	63	65	37.978		66.4624	15.5187	0.778423	5.42795	0.190428	4.81996	1.25664	4.29116	1.07838	0.175994
333	C0012	C	6	H	6	43	45	48.389		77.8173	12.8014	0.0489375	1.03175	0.0691499	0.734104	0.0653438	3.48669	3.91866	0.0266215
333	C0012	C	6	H	7	80	82	50.057		78.8638	12.0807	0.247677	1.73233	0.1534	1.94662	0.252404	4.03758	0.666036	0.0195349
333	C0012	C	7	H	8	6	8	59.145		78.5529	12.127	0.248665	2.08582	0.127653	1.93126	0.212862	3.93846	0.744368	0.0310249
333	C0012	C	7	H	8	75	77	59.787		73.2073	13.6691	0.581373	2.65127	0.0754842	2.22863	0.565006	3.61617	3.32152	0.0840826
333	C0012	C	7	H	1	79	81	52.735		61.0538	15.3048	1.04621	8.35146	0.220549	6.99211	2.73678	3.5652	0.587909	0.141137
333	C0012	C	7	H	6	56	58	57.337		73.1999	12.9346	0.578114	4.3717	0.166295	3.28877	0.531529	4.03349	0.793683	0.101906
333	C0012	C	8	H	5	38	40	64.513		76.3628	12.7071	0.352975	2.67621	0.127983	2.57827	0.35927	3.95773	0.833167	0.0444766
333	C0012	C	8	H	5	102	104	65.108		76.9139	12.7845	0.215794	1.56666	0.0886786	1.27958	0.188858	4.20504	2.73604	0.0209969
333	C0012	C	8	H	6	49	51	65.921		78.0115	12.2506	0.340331	1.97913	0.08418	2.15763	0.375613	3.72362	1.03926	0.0381548
333	C0012	C	8	H	CC	37	39	69.472		79.2684	11.921	0.26116	1.46498	0.0643982	1.64106	0.245137	3.74955	1.36237	0.0219623
333	C0012	C	9	H	2	42	44	71.348		79.0347	11.9944	0.264955	1.56972	0.0733085	1.67353	0.241508	3.72996	1.38058	0.0373928
333	C0012	C	9	H	7	33	35	77.152		75.7674	13.3421	0.3109	1.7997	0.107703	2.01365	0.368908	3.78418	2.46556	0.0399023
322	C0012	A	4	R	2	57	59	80.575		79.3607	11.6012	0.24388	1.52882	0.0919695	1.36115	0.206603	4.06096	1.51829	0.0263621
333	C0012	D	4	H	2	39	41	135.504		78.5925	12.2517	0.21085	1.25198	0.072868	1.35924	0.190254	3.80966	2.23879	0.0221299
333	C0012	A	10	R	7	4	6	136.89		78.8005	12.167	0.20239	1.29245	0.0642716	1.35024	0.19094	3.60846	2.2999	0.0238664
333	C0012	D	8	H	5	135	137	161.867		65.1283	19.8607	0.024333	0.795823	0.0721169	0.827892	0.369612	5.69464	7.21444	0.0120887
333	C0012	D	12	H	2	12	14	174.225		74.7661	14.4694	0	0.110251	0.0142331	1.4075	0.371468	4.22493	4.62436	0.0117578
322	C0012	A	43	R	5	39	41	446.81		76.7265	12.4377	0.335718	2.53292	0.113095	2.42262	0.380463	3.81458	1.18351	0.0528787

## Sheet: Table S3A, C0011 LA-ICP-MS
Table S3A: Chemical composition of glass separated from ash layers at Site C0011 as determined by laser ablation ICP-MS. "mbsf" is "meters below seafloor". "ppm" is "parts per million". Data are overspecified for calculation purposes.
Leg	Site	Hole	Core	Type	Section	Top (cm)	Bottom (cm)	Depth	Li	Mg	Al	P	Ca	Sc	Ti	V	Cr	Mn	Co	Cu	Zn	Ga	Rb	Sr	Y	Zr	Nb	Sn	Cs	Ba	La	Ce	Pr	Nd	Sm	Eu	Gd	Tb	Dy	Ho	Er	Tm	Yb	Lu	Hf	Ta	Pb	Th	U
								mbsf	ppm	ppm	ppm	ppm	ppm	ppm	ppm	ppm	ppm	ppm	ppm	ppm	ppm	ppm	ppm	ppm	ppm	ppm	ppm	ppm	ppm	ppm	ppm	ppm	ppm	ppm	ppm	ppm	ppm	ppm	ppm	ppm	ppm	ppm	ppm	ppm	ppm	ppm	ppm	ppm	ppm
333	C0011	C	2	H	6	53	55	8.077	47.9433	1336.62	77457	118.077	8933.76	3.80333	1244.03	7.21	4.04333	484.253	0.846	3.78667	33.9	23.5867	105.413	77.82	14.98	121.48	5.19333	1.33667	6.49333	469.753	14.66	31.8067	3.37333	11.37	2.02667	0.435	1.9	0.306	2.21	0.505667	1.63	0.300667	1.81333	0.374333	3.46667	0.412	17.4633	7.83667	2.25
333	C0011	D	28	X	4	81	83	31.278	10.775	1649.76	76480.7	130.4	14794.3	10.9725	1690.15	3.4575	5.4875	638.535	1.655	10.6025	54.5	20.28	20.2575	101.312	48.285	212.637	2.1375	1.675	1.25425	298.293	8.015	22.8975	3.5425	17.575	4.99	1.107	5.96	1.108	7.41	1.7105	5.0875	0.83625	5.935	0.89075	5.92	0.1545	6.555	1.1595	0.6425
333	C0011	D	2	H	1	80	82	50.549	40.0467	1122.46	72052.4	85.7733	7718.77	2.14667	1427.33	9.41333	4.965	443.713	0.733667	3.12667	41.47	33.5733	152.44	143.01	16.04	146.443	15.4533	1.37333	5.56667	899.163	29.6733	62.5633	6.20667	21.2233	3.09	0.603667	2.49667	0.332667	2.7	0.556667	1.80667	0.272333	2.28333	0.343667	4.57	1.138	22.03	14.85	3.75333
333	C0011	D	4	H	2	53	55	62.295	37.72	458.607	75559.1	63.44	6575.25	2.56667	474.74	0.484333	8.97333	512.673	0.360333	4.19	35.0367	27.9733	181.543	99.1567	20.96	86.8367	10.64	2.18667	5.88667	620.323	31.1367	62.4833	6.52333	21.8467	3.63667	0.494	2.89	0.496667	3.11333	0.674333	2.20333	0.362333	2.50667	0.464667	2.93333	1.101	21.4133	18.0133	4.81667
333	C0011	D	5	H	7	4	6	67.209	28.31	890.337	80991.1	107.687	12578.7	9.97333	1100.45	0.790333	8.11	546.977	1.12833	9.56667	67.2833	34.5467	134.007	184.847	39.9	284.563	11.7567	2.3	4.89333	787.413	34.9733	74.8233	8.86	35.7167	7.25	1.209	6.62667	1.022	6.96	1.45567	4.5	0.684667	4.45333	0.657333	7.49667	0.672	18.3867	10.38	2.46
333	C0011	D	6	H	2	91	93	219.667	30.5933	134.633	70245	43.39	6074.96	6.68	544.437	0.176667	5.51	362.183	0.0786667	5.39333	70.29	35.1467	157.26	79.52	34.27	154.2	16.31	3.02667	5.98	796.897	38.8333	88.3	9.97333	37.62	7.57	1.02567	6.34	0.974333	6.48667	1.254	3.77667	0.53	3.64	0.562333	5.79333	1.205	23.6933	15.92	4.08
[truncated: 15 more columns]

## Sheet: Table S3B, C0012 LA-ICP-MS
Table S3B: Chemical composition of glass separated from ash layers at Site C0012 as determined by laser ablation ICP-MS. "mbsf" is "meters below seafloor". "ppm" is "parts per million". Data are overspecified for calculation purposes.
Leg	Site	Hole	Core	Type	Section	Top (cm)	Bottom (cm)	Depth		Li	Mg	Al	P	Ca	Sc	Ti	V	Cr	Mn	Co	Cu	Zn	Ga	Rb	Sr	Y	Zr	Nb	Sn	Cs	Ba	La	Ce	Pr	Nd	Sm	Eu	Gd	Tb	Dy	Ho	Er	Tm	Yb	Lu	Hf	Ta	Pb	Th
								mbsf		ppm	ppm	ppm	ppm	ppm	ppm	ppm	ppm	ppm	ppm	ppm	ppm	ppm	ppm	ppm	ppm	ppm	ppm	ppm	ppm	ppm	ppm	ppm	ppm	ppm	ppm	ppm	ppm	ppm	ppm	ppm	ppm	ppm	ppm	ppm	ppm	ppm	ppm	ppm	ppm
333	C0012	C	1	H	3	116	118	3.173		63.3775	4259.45	125192	389.99	24156.9	14.48	4017.87	24.5475	9.3025	923.745	3.2675	7.79	93.02	40.8375	181.565	201.835	60.045	383.765	18.685	3.725	11.1025	709.253	40.455	90.255	11.0675	42.6475	9.3775	1.8425	9.24	1.455	9.5325	2.2025	6.085	0.9895	6.595	1.019	10.185	1.20725	33.0075	16.49
333	C0012	C	1	H	3	57	59	3.728		19.3067	1841.08	79643.7	147.293	14151.1	13.0867	1970.29	6.64	9.87333	896.42	1.15433	8.21	66.4633	25.84	19.15	126.87	55.77	180.497	1.29333	1.62333	1.26667	435.713	7.65	21.3867	3.30667	17.5367	5.30667	1.35667	7.16667	1.25867	8.67333	1.93	6.21667	0.893333	6.84	1.075	5.42	0.105	8.17667	1.29333
333	C0012	C	7	H	6	56	58	57.337		13.1667	3053.08	70738.9	406.837	23370.7	18.57	3707.44	3.27667	6.51	1272.62	4.13667	11.7367	120.883	20.3967	11.16	130.527	55.07	147.347	1.196	1.33	1.20533	242.997	4.92333	15.51	2.99	16.52	5.25333	1.64667	7.45333	1.32033	8.79667	2.09667	6.28667	0.915	6.67	1.073	4.39667	0.141	7.68	0.55
333	C0012	C	8	H	5	102	104	65.108		16.51	1201.87	68411.4	91.4433	9148.17	10.9167	1364.01	3.53	7.70333	732.953	0.952667	9.24	60.04	25.25	75.97	118.837	47.1067	224.01	5.43	1.79333	3.66333	538.973	19.1333	47.8933	6.57667	28.8433	6.95667	1.33333	7.07	1.17767	8.20333	1.71	5.23333	0.849	6.01333	0.826	6.89667	0.398667	13.92	6.48667
333	C0012	C	9	H	7	33	35	77.152		16.03	4638.71	77578	161.047	14365.5	15.3	2048.76	10.96	14.9667	963.127	4.38967	27.0667	69.35	26.3067	80.62	163.537	42.6567	200.737	5.04	2.05	4.43333	491.46	16.75	38.8433	5.28333	23.0067	5.95	1.34333	6.10333	1.06733	7.01333	1.60667	4.54667	0.664333	5.23	0.720333	5.73667	0.401333	18.5433	7.12333
[truncated: 16 more columns]

## Sheet: Table S4, EM conc
Table S4: Compositions of end members used in Total Inversion statistical modelling. "ppm" means "parts per million".
End-member	Citations	Al (ppm)	TI (ppm)	Sc (ppm)	Cr (ppm)	Nb (ppm)	La (ppm)	Th (ppm)
Avg Shale (PAAS)	Taylor and McLennan (1985)	100038	5995	16	110	19	38	14.6
Upper Continental Crust (UCC)	Taylor and McLennan (1985)	80454	2998	11	35	25	30	10.7
Chinese Loess	Jahn et al. (2001)	67168	4077	10.7	60.2	11.2	28.5	9.9
Izu-Bonin Front Arc (IBFA)	Taylor and Nesbitt (1998)	89452	6091	40.6	24.3	0.45	2.1	0.19
Ryukyu Dacite	GEOROC average	82814	3772	11.9	27.4	14.9	21.8	8.8
Ryukyu Rhyolite	Shinjo and Kato (2000)	68968	1139	9.7	21	4.5	14	3.2
I-B Rhyolite	GEOROC average	65127	1004	11.5	19	5	13.5	4.7
I-B Dacite	GEOROC average	77044	2628	24.3	12.5	0.7	5	0.4
I-B Andesite	GEOROC average	86751	5307	35.6	68	1.2	6.3	0.48
I-B Boninite	GEOROC average	56971.6	935.805	37.65	1064.04	0.84	0.975105	0.113333
Honshu Dacite	GEOROC average	77031	2872	13	16.6	7.4	16.8	4.5
Honshu Rhyolite	GEOROC average	76191	783	2.7	6	5.3	15.5	3.3
Kyushu Dacite	Sugimoto et al. (2006)	86488	3507	97.2	10.5	9.5	16.6	6.3
Kyushu Andesite	Sugimoto et al. (2006)	88142	4856	134	15.9	8.6	13.4	4.8
GEOROC data downloaded in January-March, 2014. Data overspecified for calculation purposes.

## Sheet: Table S5, QFA
Table S5: QFA generated end-members. As per Pisias et al. (2013), these compositions are not necessarily precisely accurate, but are useful for illustrative purposes. Output is overspecified in terms of significant figures in order to facilitate comparison.
		Al (ppm)	TI (ppm)	Sc (ppm)	Cr (ppm)	Nb (ppm)	La (ppm)	Th (ppm)	% Information
Combined dataset	Factor 1	81396.4	4089.01	21.2454	37.1102	6.1461	14.9359	5.8596	28.8258
	Factor 2	81765.6	3722.88	8.75	53.7064	11.2483	0	8.6059	13.0136
	Factor 3	82092.4	3239.83	4.4468	185.597	12.3907	22.5702	13.4811	41.2694
	Factor 4	81530.2	3970.38	11.8874	0	17.8124	27.0703	13.3709	16.2061
								Total Information Explained (%)	99.3149
Site C0011	Factor 1	82666.5	3899.65	9.6137	22.282	15.4597	30.8913	12.792	36.34
	Factor 2	82627.4	3934.84	17.341	45.2954	7.4508	17.8431	7.0239	30.4625
	Factor 3	82512.7	3236.9	9.8713	821.866	16.5362	30.1186	29.1917	26.7811
	Factor 4	82780.4	3808.38	6.2906	46.5391	7.029	2.3844	6.1588	5.5845
								Total Information Explained (%)	99.1681
Site C0012	Factor 1	80608	3419.13	7.3586	82.1749	13.4646	22.681	11.9058	59.7576
	Factor 2	80355.5	3715.66	10.9693	62.0181	11.6088	0	8.9452	13.5087
	Factor 3	79631.2	4431.85	27.6265	46.4111	6.0911	15.4669	6.084	24.8697
	Factor 4	80529.6	3419.45	11.34	174.472	0	25.3664	4.5349	1.2313
								Total Information Explained (%)	99.3673

## Sheet: Table S6, CLS tests
Table S6: R-value results of top ten CLS models from stability tests. * indicates model(s) excluded from average based on maximized r-values, geological reasonableness, and presence of real values (Supplemental Material). See main text for description of "Most Common", "Dacite" and "Rhyolite". I-B means Izu-Bonin.
Combined Dataset								Correlation Coefficient (r-value)
					Al	Ti	Sc	Cr	Nb	La	Th
1	Chinese Loess	"Rhyolite"	I-B Dacite	Kyushu Dacite	1	0.999416	0.840633	0.373271	0.835671	0.619447	0.79193
2	Chinese Loess	"Rhyolite"	I-B Dacite	Kyushu Andesite	1	0.999431	0.820607	0.374515	0.837797	0.619533	0.790685
3	Chinese Loess	"Rhyolite"	Honshu Dacite	Kyushu Andesite	0.999999	0.999537	0.945329	0.484934	0.782051	0.466728	0.648742
4	Chinese Loess	"Rhyolite"	Honshu Dacite	Kyushu Dacite	0.999999	0.999502	0.946199	0.476294	0.774621	0.452493	0.664997
5	Avg Shale (PAAS)	"Rhyolite"	I-B Dacite	Kyushu Dacite	0.999999	0.998725	0.787423	0.489549	0.797092	0.503543	0.719414
6	Chinese Loess	I-B Andesite	Honshu Rhyolite	Kyushu Dacite	1	0.999094	0.76512	0.263228	0.805167	0.656336	0.796575
7	Avg Shale (PAAS)	"Rhyolite"	I-B Dacite	Kyushu Andesite	0.999999	0.998797	0.754232	0.492256	0.803137	0.513523	0.723157
8	"Dacite"	"Most Common"	I-B Front Arc	Honshu Rhyolite	1	0.999985	0.757874	0.040707	0.83865	0.796431	0.8476	*
9	"Dacite"	"Rhyolite"	I-B Front Arc	Honshu Dacite	1	0.999982	0.810587	0.057127	0.838702	0.745919	0.797117	*
10	Chinese Loess	I-B Andesite	Honshu Rhyolite	Kyushu Andesite	1	0.999092	0.738946	0.265962	0.805252	0.642993	0.79418
Site C0011								Correlation Coefficient (r-value)
					Al	Ti	Sc	Cr	Nb	La	Th
1	Chinese Loess	"Rhyolite"	I-B Dacite	Kyushu Dacite	1	0.999345	0.734029	0.354962	0.847297	0.797265	0.760733
2	Chinese Loess	"Rhyolite"	Honshu Dacite	Kyushu Andesite	0.999999	0.99954	0.915144	0.493018	0.774355	0.709312	0.593483
3	Chinese Loess	"Rhyolite"	Honshu Dacite	Kyushu Dacite	0.999999	0.999524	0.909758	0.487203	0.766655	0.695048	0.612132
4	Chinese Loess	"Rhyolite"	I-B Dacite	Kyushu Andesite	1	0.999342	0.703469	0.354723	0.848788	0.797196	0.757474
5	Chinese Loess	"Rhyolite"	I-B Front Arc	Kyushu Andesite	0.999998	0.999653	0.816702	0.532747	0.72977	0.612854	0.754558	*
6	Avg Shale (PAAS)	"Rhyolite"	I-B Front Arc	Kyushu Andesite	0.999998	0.999455	0.784693	0.721686	0.635778	0.561874	0.729726	*
7	Avg Shale (PAAS)	"Rhyolite"	Honshu Dacite	Kyushu Dacite	0.999998	0.999057	0.910233	0.65125	0.753954	0.612314	0.48834
8	Avg Shale (PAAS)	"Rhyolite"	I-B Front Arc	Kyushu Dacite	0.999998	0.999464	0.803834	0.719187	0.62162	0.548112	0.711959	*
9	"Dacite"	"Most Common"	I-B Front Arc	Honshu Rhyolite	1	0.999986	0.765667	0.012058	0.854848	0.874923	0.886288	*
10	Avg Shale (PAAS)	"Rhyolite"	Honshu Dacite	Kyushu Andesite	0.999998	0.999148	0.887704	0.660095	0.759184	0.6199	0.46643
Site C0012								Correlation Coefficient (r-value)
					Al	Ti	Sc	Cr	Nb	La	Th
1	Chinese Loess	"Rhyolite"	I-B Dacite	Kyushu Dacite	1	0.999458	0.911368	0.395344	0.822973	0.313232	0.825857
2	Chinese Loess	"Rhyolite"	I-B Dacite	Kyushu Andesite	1	0.999487	0.898394	0.398225	0.826098	0.314717	0.826781
3	Chinese Loess	I-B Andesite	Honshu Rhyolite	Kyushu Dacite	1	0.999333	0.860224	0.349959	0.783917	0.511581	0.755585
4	Chinese Loess	I-B Andesite	Honshu Rhyolite	Kyushu Andesite	1	0.999338	0.847779	0.35231	0.789068	0.488153	0.755403
5	Avg Shale (PAAS)	"Dacite"	I-B Rhyolite	I-B Andesite	1	0.999783	0.393774	0.753491	0.835432	0.458254	0.776094
6	"Dacite"	"Rhyolite"	I-B Front Arc	Honshu Dacite	1	0.999983	0.848086	0.129041	0.823479	0.611699	0.763061	*
7	Chinese Loess	I-B Rhyolite	I-B Andesite	Kyushu Dacite	1	0.999621	0.768334	0.382537	0.782199	0.455326	0.780598
8	Chinese Loess	I-B Rhyolite	I-B Andesite	Kyushu Andesite	1	0.999616	0.785501	0.376446	0.78497	0.43879	0.776787
9	Avg Shale (PAAS)	"Dacite"	I-B Front Arc	I-B Rhyolite	1	0.999803	0.400772	0.76244	0.809763	0.416529	0.770466	*
10	"Dacite"	"Most Common"	I-B Front Arc	Honshu Rhyolite	1	0.999985	0.775295	0.090983	0.822193	0.659904	0.807998	*

## Sheet: Table S7, combined per. abd.
Table S7: Final modeled end member contributions, Combined Dataset. "mbsf" means "meters below seafloor". See main text for description of sources.
										% Abundance
Leg	Site	Core	Hole	Type	Section	Top (cm)	Bottom (cm)	Depth (mbsf)	Asian Dust	Rhyolitic Ash	Dacitic Ash	Kyushu Ash
333	C0011	C	1	H	1	46	48	0.441	60.0401	15.0167	23.5534	1.38981
333	C0011	C	2	H	2	0	19	4.634	63.2322	12.319	23.6962	0.752673
333	C0011	C	2	H	5	0	19.5	7.361	62.5849	12.1749	24.5369	0.703322
333	C0011	C	2	H	8	0	19	10.075	65.5397	16.0917	17.5925	0.776088
333	C0011	C	3	H	8	0	21	19.47	64.812	14.3171	20.1273	0.743524
333	C0011	D	1	H	4	0	20	24.979	64.6102	10.1552	24.0531	1.18156
333	C0011	D	2	H	5	0	20	35.794	58.8003	12.8717	27.7147	0.613316
333	C0011	D	3	H	2	81.5	83.5	42.117	58.9886	11.3378	28.8911	0.782459
333	C0011	D	4	H	5	0	20.5	51.939	51.551	9.83603	38.0669	0.546059
333	C0011	D	5	H	5	0	20	60.694	58.2021	8.25165	31.3118	2.23449
333	C0011	D	7	H	4	0	20	76.472	47.9891	9.43393	40.9627	1.61429
333	C0011	D	9	H	3	0	20	84.287	61.7876	13.5547	23.6113	1.04647
333	C0011	D	10	H	5	0	21	95.606	60.4975	11.723	27.2544	0.525036
333	C0011	D	11	H	5	0	22	104.152	67.7155	15.618	16.0218	0.644626
333	C0011	D	12	H	5	0	20.5	114.25	54.8751	12.4744	31.67	0.980488
333	C0011	D	13	H	1	56	58	119.333	64.6385	14.8734	19.4294	1.05861
333	C0011	D	14	H	5	0	22	129.72	61.7081	13.2433	24.1374	0.911201
333	C0011	D	15	H	4	0	21.5	137.518	68.1477	16.0647	14.4493	1.33826
333	C0011	D	16	H	3	33	35	144.817	64.1682	14.6315	20.1244	1.07588
333	C0011	D	17	H	6	0	20.5	154.832	63.4985	16.7194	18.7738	1.00826
333	C0011	D	18	H	4	0	21.5	161.38	65.7616	14.1411	17.7925	2.30476
333	C0011	D	19	H	3	0	20	170.237	64.3908	19.5939	14.7095	1.30587
333	C0011	D	21	H	4	0	20.5	182.687	68.4973	15.3449	15.0849	1.07291
333	C0011	D	23	T	3	21	23	189.025	65.8727	16.7955	16.4441	0.887685
333	C0011	D	25	T	2	0	29	200.855	65.8426	15.366	17.4281	1.36335
333	C0011	D	27	X	3	0	30.5	212.136	71.5537	18.9115	8.21581	1.31895
333	C0011	D	29	X	4	0	31	223.326	66.3302	12.4947	18.6641	2.51099
333	C0011	D	31	X	4	0	29	238.14	60.9244	12.4378	25.2638	1.37405
333	C0011	D	33	X	3	0	30.5	248.87	62.1449	19.699	17.3485	0.80765
333	C0011	D	34	X	4	0	34	254.441	69.5691	18.2683	10.898	1.2646
333	C0011	D	36	X	1	46	48	266.433	62.4989	13.5423	22.8606	1.09822
333	C0011	D	37	X	4	0	32.5	279.348	67.9399	17.6524	13.5897	0.817971
333	C0011	D	38	X	3	0	35	285.32	65.5704	15.1489	18.0446	1.23605
333	C0011	D	39	X	5	0	35	297.042	59.6709	12.0449	27.5183	0.765908
333	C0011	D	40	X	5	0	40	306.259	65.2948	18.3155	15.4615	0.928174
333	C0011	D	41	X	5	0	38.5	316.37	58.5728	19.6157	20.8365	0.974936
333	C0011	D	42	X	4	0	39	324.012	70.0069	19.883	8.34215	1.768
333	C0011	D	43	X	3	0	35.5	331.795	65.5507	18.2355	15.0609	1.15292
333	C0011	D	45	X	3	0	38.5	342.083	70.4734	16.2915	11.8162	1.41891
333	C0011	D	48	X	3	0	38	356.491	62.7785	17.032	18.7553	1.43427
333	C0011	D	52	X	1	134	136	376.34	66.6307	12.7056	17.6685	2.99524
322	C0011	B	6	R	5	27	50	388.589	68.5617	17.5647	9.60883	4.26486
322	C0011	B	10	R	3	2	32	424.765	64.0702	20.3473	9.5426	6.03988
322	C0011	B	13	R	3	0	25	453.32	51.3084	15.4389	32.3284	0.9243
322	C0011	B	15	R	3	2	42	471.992	65.3392	18.6859	14.5232	1.45174
322	C0011	B	19	R	3	2	37	492.617	67.83	14.6291	16.6274	0.913548
322	C0011	B	21	R	2	2	36	501.67	70.1184	18.6882	6.69688	4.49651
322	C0011	B	23	R	2	2	42	521.165	63.248	10.8234	25.1086	0.820035
322	C0011	B	25	R	2	0	50	539.86	56.9364	7.9752	33.7369	1.35147
322	C0011	B	26	R	2	0	52	550.22	71.9401	17.1736	5.95047	4.93586
322	C0011	B	27	R	2	2	48	559.38	58.3144	8.82599	31.5358	1.32378
322	C0011	B	30	R	2	2	52	581.8	64.1621	14.8335	16.6246	4.37974
322	C0011	B	31	R	2	0	50	587.83	68.0325	17.7603	12.0778	2.12934
322	C0011	B	32	R	5	2	57	601.41	72.2924	18.4344	5.77248	3.50071
322	C0011	B	33	R	2	3	54	605.97	71.2952	19.1003	5.48652	4.11791
322	C0011	B	35	R	4	3	54	628.171	67.0213	14.8312	16.5703	1.57724
322	C0011	B	36	R	2	0	50	634.665	68.8176	11.2673	18.6093	1.30579
322	C0011	B	37	R	2	0	50	644.709	71.9535	18.8248	5.7878	3.43396
322	C0011	B	38	R	2	2	52	654.41	68.3106	16.8567	11.0105	3.82212
322	C0011	B	40	R	3	2	53	674.835	70.0736	12.7021	14.7643	2.45997
322	C0011	B	44	R	3	2	58	691.11	74.0411	16.3876	6.31606	3.25525
322	C0011	B	45	R	3	2	53	700.3	69.866	13.6704	15.1153	1.34834
322	C0011	B	47	R	2	5	57	712.66	73.0381	15.5397	8.25977	3.16248
322	C0011	B	48	R	3	30	83	722.835	74.0965	17.8024	5.57408	2.52698
322	C0011	B	52	R	6	2	55.5	763.36	72.7788	16.2178	5.83965	5.16381
322	C0011	B	56	R	2	5	58	844.579	75.0341	14.7539	8.38463	1.82742
333	C0012	D	1	H	2	0	19	0.595	57.9215	8.62861	33.0269	0.423003
333	C0012	C	2	H	4	50	70	8.962	64.1348	16.2248	18.8893	0.751162
333	C0012	C	2	H	6	58	78	11.719	63.1844	15.0458	21.2308	0.539003
333	C0012	C	2	H	7	68	70	13.141	64.1572	11.2484	23.7649	0.829551
333	C0012	C	3	H	3	55	75	17.16	60.3448	6.81008	30.4269	2.41825
333	C0012	C	3	H	6	49	51	21.116	65.3271	12.6192	21.1055	0.948157
333	C0012	C	4	H	4	0	20	27.483	63.1523	16.4124	19.7801	0.655125
333	C0012	C	4	H	8	80	82	32.228	62.2243	13.0048	23.8727	0.898207
333	C0012	C	5	H	3	0	21	35.729	66.2315	15.5321	15.7091	2.52727
333	C0012	C	6	H	4	0	21.5	46.451	66.7245	15.4132	17.3783	0.483984
333	C0012	C	7	H	3	46	48	54.478	63.5113	14.4725	20.9531	1.06315
333	C0012	C	8	H	4	0	21	63.946	67.2758	18.4621	11.9975	2.26461
333	C0012	C	9	H	4	0	20.5	73.76	64.7196	17.233	17.3097	0.737715
322	C0012	A	5	R	2	27	46	89.695	67.088	17.8126	11.8201	3.27935
333	C0012	C	11	H	6	0	21	91.497	61.6827	15.5281	21.7369	1.05226
322	C0012	A	6	R	3	12	33	100.47	63.0651	19.5091	16.696	0.729916
322	C0012	A	7	R	5	90	108	107.655	70.9303	18.0375	8.85076	2.18144
333	C0012	C	14	H	2	0	26.5	108.309	62.8547	16.9169	19.2751	0.953209
322	C0012	A	8	R	5	3	23.5	116.65	66.3211	17.773	11.817	4.08884
333	C0012	C	15	H	4	0	29.5	119.321	62.0862	16.9739	19.4801	1.45974
333	C0012	D	2	H	3	0	26.5	119.507	64.0083	18.059	17.1212	0.811488
322	C0012	A	9	R	4	2	23	124.05	66.5814	17.1776	15.1404	1.10071
333	C0012	D	3	H	3	0	28.5	129.198	62.3272	15.5617	20.8238	1.28719
333	C0012	D	4	H	4	0	29.5	137.291	68.4252	17.4054	12.0442	2.12529
333	C0012	D	4	H	6	96	98	139.538	66.9595	13.7023	16.4278	2.91036
333	C0012	D	5	H	4	0	30	144.358	65.1874	16.6459	16.6409	1.52577
333	C0012	D	7	H	3	0	29	154.564	58.5294	15.6028	25.4698	0.397978
322	C0012	A	13	R	2	27	47	159.91	68.2527	15.9876	10.4495	5.31027
333	C0012	D	8	H	4	0	29.5	160.269	66.7943	14.532	14.9432	3.73052
333	C0012	D	10	H	3	0	31	168.341	59.0735	15.0969	25.4097	0.419908
333	C0012	D	11	H	2	0	30	171.283	63.2423	16.4479	18.7018	1.6081
333	C0012	D	13	H	4	0	31	178.66	56.9988	12.2353	27.7493	3.01664
322	C0012	A	17	R	3	0	27	198.815	61.7929	15.8554	21.31	1.04169
322	C0012	A	18	R	2	26	48	208.16	62.6949	15.6047	20.1637	1.53669
322	C0012	A	20	R	2	17	19	226.77	65.392	14.4313	19.2906	0.886028
322	C0012	A	23	R	3	0	30	256.1	71.4912	12.7602	10.2583	5.49031
322	C0012	A	24	R	2	2	34	263.95	64.1752	13.8735	19.0775	2.87378
322	C0012	A	25	R	2	27	57	274.185	68.8001	15.9763	13.9045	1.31916
322	C0012	A	27	R	2	2	33.5	292.055	64.4842	15.0392	18.7164	1.76014
322	C0012	A	29	R	4	40	42	313.655	67.7461	10.8891	19.873	1.49181
322	C0012	A	32	R	2	0	41	340.13	62.0905	5.21078	26.3123	6.38644
322	C0012	A	33	R	2	2	42	349.23	67.2009	16.1588	10.5322	6.10819
322	C0012	A	34	R	3	2	44	359.56	67.7064	16.7138	13.6516	1.9282
322	C0012	A	35	R	2	25	65	367.06	70.1756	10.3126	17.0133	2.49853
322	C0012	A	36	R	2	0	34	376.17	71.54	15.487	8.36486	4.60812
322	C0012	A	37	R	2	2	39	386.32	72.7104	15.9786	8.82381	2.48711
322	C0012	A	39	R	3	0	35	406.9	77.2468	13.9137	3.98249	4.857
322	C0012	A	42	R	2	31	71.5	434.255	69.9927	11.5769	11.3293	7.10112
322	C0012	A	47	R	2	0	30	480.77	63.5303	5.63097	25.6065	5.23224
322	C0012	A	49	R	2	0	37	499.925	67.0391	13.1435	13.7638	6.05358
333	C0012	G	1	R	3	0	49	516.59	69.0692	7.86921	16.4239	6.63773

[truncated: 3 more sheets: Table S8A, C0011 per. abd. MAR, Table S8B, C0012 per. abd. MAR, Table S9, QFA tests]
